# Supplementary material
Source: ML conference proceedings conference paper supplement (https://openreview.net/forum?id=XkMCKoHNCD)
Supplement: supplementary_material [file attachment]

---

# A test of stochastic parroting in a generalisation task: predicting the characters in TV series

---

Anonymous Author(s)

Affiliation

Address

email

## Abstract

1 There are two broad, opposing views of the recent developments in large language  
2 models (LLMs). The first of these uses the term "stochastic parrots" from Emily  
3 Bender et al [3] to emphasise that because LLMs are simply a method for creating  
4 a probability distribution over sequences of words, they can be viewed as simply  
5 parroting information in the training data. The second view, "Sparks of AGI" from  
6 Sebastien Bubeck et al [6], posits that the unprecedented scale of computation in  
7 the newest generation of LLMs is leading to what its proponents call "an early (yet  
8 still incomplete) version of an artificial general intelligence (AGI) system". In this  
9 article, we propose a method for making predictions purely from the representation  
10 of data inside the LLM. Specifically, we create a logistic regression model, using  
11 the principal components of a LLM model embedding as features, in order to  
12 predict an output variable. The task we use to illustrate our method is predicting the  
13 characters in TV series, based on their lines in the show. We show that our method  
14 can, for example, distinguish Penny and Sheldon in the Big Bang Theory with  
15 an AUC performance of 0.79. Logistic regression models for other characters in  
16 Big Bang Theory have lower values of AUC (ranging from 0.59 to 0.79), with the  
17 most significant distinguishing factors between characters relating to the number  
18 and nature of comments they make about women. The characters in the TV-series  
19 Friends are more difficult to distinguish using this method (AUCs range from 0.61  
20 to 0.66). We find that the accuracy of our logistic regression on a linear feature  
21 space is slightly lower than GPT-4, which is in turn at a level comparable to two  
22 human experts. We discuss how the method we propose could be used to help  
23 researchers be more specific in the claims they make about large language models.

## 24 1 Introduction

25 Large language models (LLMs) are neural networks trained on a large text corpus to predict the next  
26 word, phrase or paragraph in that dataset [25]. As the number of network parameters and the size of  
27 the corpus increases, the ability of this network to write convincing-sounding texts improves [15]. As  
28 a result, an increasing number of compelling LLM applications, from CHAT-GPT to Copilot, have  
29 been developed. Recently, Bubeck et al. argued that "beyond its mastery of language, GPT-4 can solve  
30 novel and difficult tasks that span mathematics, coding, vision, medicine, law, psychology and more,  
31 without needing any special prompting" [6]. For these authors, this ability to generalise revealed  
32 "Sparks of AGI", going on to state that they believed "that [GPT-4] could reasonably be viewed as an  
33 early (yet still incomplete) version of an artificial general intelligence (AGI) system."

34 The stochastic parrots paradigm critiques such claims by pointing out that large language models  
35 simply predict the next word, sentence or paragraph, and it is humans who attribute understanding to  
36 its output [3]. LLMs simply replicate examples (i.e. parrot text) from a massive corpus of data [7].

37 The stochastic parrots view provides an epistemic critique of claims, such as "Sparks of AGI", about  
38 artificial general intelligence. For example, in the context of the benchmark tests (such as those later  
39 carried out by [6]), Raj et al. (2021) write, "the reality of [benchmark] development, use and adoption  
40 indicates a *construct validity* issue, where the involved benchmarks — due to their instantiation  
41 in particular data, metrics and practice — cannot possibly capture anything representative of the  
42 claims to general applicability being made about them." In other words, the very notion of generality,  
43 sought to be proven in "Sparks of AGI", cannot be captured by benchmark problems [6]. This  
44 critique is fundamental: it doesn't matter how many specific tasks a model completes, there is no  
45 convergence towards generality. Even setting these epistemic problems aside, the stochastic parrots  
46 view also has practical implications for how we evaluate LLM performance. For example, Lewis  
47 and Mitchell (2024) manipulate benchmark tasks to construct 'counterfactual' tasks, by for example  
48 adding information that solves the task but LLM's neglect this information, because they are parroting  
49 answers to similar, previously trained-on examples [18].

50 In spite of the limitation of benchmarks, the fact remains that LLMs do perform well over a wide  
51 range of tasks, with little or no additional training data. It is the question of understanding how such  
52 performance might arise which we address in this paper. Instead of proposing new benchmarks, we  
53 focus on comparing how LLMs perform to simpler, well-understood statistical methods on a novel  
54 task. An approach like ours has previously been pursued medical imaging — where a systematic  
55 review showed that logistic regression on selected features performed (on average) just as well as  
56 complicated machine learning approaches [8] — and with respect to conflict prediction — logistic  
57 regression perform just as well (as is easier to interpret) than more complex machine learning models  
58 [16].

59 For many general tasks, a relatively straightforward method of making predictions is to use linear or  
60 logistic regression on the leading principal components of a data set. One example is using principle  
61 components of 'likes' of Facebook users to predict the answers people gave to big-five personality  
62 tests [32, 19, 17]. Konsinski et al. (2016) first performed PCA or Latent Dirichlet Allocation (LDA)  
63 on the matrix of likes and Facebook users, and then used the leading components of the PCA (or  
64 clusters of LDA) in a regression model to predict the user's answers in personality tests [17]. This  
65 allowed the authors to study how the accuracy of predictions increased with the number of dimensions  
66 of the Facebook likes. The method is linear in the PCA space and has the advantage that the results  
67 can be interpreted qualitatively. For example, young and female users could be predicted as liking  
68 "humorous and juvenile" (author's choice of words) statements such as, "I finally stop laughing . . .  
69 look back over at you and start all over again" [17].

70 The above method is potentially interesting in the context of stochastic parrots, because it allows us  
71 to, so to speak, look inside the parrot's brain. Large language models encode information using vector  
72 semantics: words and sentences are represented as vectors [14, 24, 20], referred to as embeddings.  
73 Words that occur in similar contexts tend to have similar meanings, therefore, they will have a similar  
74 vector [25]. The vectors are generally based on a co-occurrence matrix, a way of representing how  
75 often words co-occur. An alternative to using the term-document matrix to represent words as vectors  
76 of document counts, is to use the term-term matrix . If we then take every occurrence of each word  
77 and count the context words around it, we get a word-word co-occurrence matrix [14]. Embeddings  
78 can be obtained with transformers models [27, 9, 11, 13, 31, 30], which were initially developed for  
79 machine translation in 2017 [27, 28].

80 We can use principal components of the embeddings of a language model, with respect to a specific  
81 problem, in order to both understand what information is used in solving the task and to test the  
82 degree to which performance on that task is achieved from the representation of the data or from  
83 some other unknown mechanism. To make these statements concrete, we now outline what we do in  
84 this article. We address the task of predicting which character said which specific lines of dialogue  
85 in two US TV series: Big Bang Theory and Friends. This task is reminiscent of the personality  
86 research discussed above in that the characters in the show have very stereotypical personalities:  
87 can we predict character personalities from their line in the show? Such problems are of specific  
88 interest for this article, for three reasons (1) an increasing number of applications of AI involve  
89 supposed personality tests and analyses [10]; (2) such tests raise ethical issues about both reliability  
90 and applications [29, 1]; (3) they are sometimes used to imply that machines can understand us better  
91 than we understand ourselves [32]. The character personality test is an example of generalisation in  
92 the sense that, while large language models might have been fed data from these series, they haven't  
93 been trained to solve this specific task.

94 We proceed as follows. We first detail the method of and logistic regression on the principal  
95 components of the embeddings. We then analyse which PCA components are most predictive of  
96 statements by the characters, how the number components affects accuracy and differences between  
97 the TV shows. Finally, we compare performance of our simpler model to GPT-4 [22] and one human  
98 expert, with extensive experience of the two TV shows.

## 99 2 Methods

### 100 2.1 Embeddings and PCA

101 The dataset is the transcript of the first 10 seasons of the TV-series The Big Bang Theory <sup>1</sup> and 10  
102 seasons of the TV-series Friends <sup>2</sup> in English. We cleaned the dataset, by only keeping the main  
103 characters and their respective dialogue lines. This gives 44,966 dialogue lines for the TV series The  
104 Big Bang Theory and 51,615 dialogue lines for the TV series Friends. We then transformed these  
105 dialogue lines into a vector, i.e. we create embeddings using the python library SentenceTransformer  
106 and the model 'all-MiniLM-L6-v2' [26]. Each dialogue line then has a specific embedding, a vector  
107 of dimension 384. For comparison, the small text embedding of OpenAi, 'text-embedding-3-small',  
108 gives 1,536 output dimension [21, 5].

109 We then performed a principal component analysis (PCA) on the embeddings (for more details of  
110 the method we follow see [12]). Principal Component Analysis (PCA) determines the directions  
111 that maximize the variation in the data. The PCA is a procedure that takes dataset with several  
112 variables, to a smaller dataset with new variables (the principal components) that will be a linear  
113 combination of the former variables. Each dimension in this space corresponds to a feature that will  
114 be explicitly defined later. To ensure a representative view of the dataset, we need to standardize  
115 it so that no single variable disproportionately influences the analysis, by removing the mean then  
116 divide by the standard deviation. Then, we calculate the covariance matrix. A covariance matrix is a  
117 square matrix that shows the covariance between pairs of variables in the dataset. The diagonal of the  
118 matrix gives the variance of the variables and the other terms give the covariance between the pair of  
119 variables. The covariance measures of how much two random variables vary together, by estimating  
120 the linearity between them. From the covariance matrix we deduce the eigenvectors and eigenvalues,  
121 by doing an eigenvalue decomposition of the covariance matrix  $C$ . We find the eigenvector by solving  
122  $(C - \lambda Id)x = 0$ , where  $x$  is the eigenvector associated with the eigenvalue  $\lambda$ . The eigenvalue gives  
123 the magnitude (or accounted variance) of the data along the new feature dimension. The eigenvector  
124 gives the direction of the data along the new feature dimension, and forms the linear combination  
125 for a principal component. The eigenvalues are in descending order and as explained in [12], they  
126 'maximize the explained variances on each dimension'. We refer to the coefficients of the leading  
127 eigenvector as the first principal component (PCA1), the second eigenvector as PCA2 and so on. We  
128 reduce the 384 dimension of each embeddings to a dimension space of 300. All calculations were  
129 performed in Sklearn [23] and full code is available here <sup>3</sup>.

130 An important aspect of our approach is gaining a qualitative understanding of how the principal  
131 components reflect the meaning of the dialogue lines. Each PCA corresponds to one eigenvector and  
132 consequently to one dimension from which we are able investigate which kind of phrases tied to that  
133 dimension. To help us make this analysis we used two-dimensional visualisation of the data. First we  
134 implemented a 10-means cluster on two principal components at a time, starting with the leading  
135 components (i.e PCA1 and PCA2). We colour each cluster and then assign the phrase nearest of the  
136 center as the cluster name (see figure 1). We also looked at the most extreme dialogue line in each  
137 PCA, by printing out the sentences with the highest values and the smallest values. From these we  
138 assigned a qualitative interpretation of the "meaning" of the leading PCAs. In the annex, we report  
139 the tenth highest values and the tenth smallest values.

### 140 2.2 Character prediction

141 In order to predict which dialogue line comes from which character, we use a logistic regression on  
142 the PCAs of the dialogue lines of the characters. We follow the notation from [12] and let  $u_{j,i}$  be the

<sup>1</sup><http://www.kaggle.com/datasets/mitramir5/the-big-bang-theory-series-transcript>

<sup>2</sup><https://github.com/yaylinda/friends-dialog/blob/master/data.csv>

<sup>3</sup>[https://github.com/amandinecaut/Friends\\_analysis.git](https://github.com/amandinecaut/Friends_analysis.git)

143 j-th the coefficient of the principal component of the i-th dialogue line. First, we normalise all the  
144 coefficients  $u_{j,i}$  of the principal components by taking away the mean and dividing by the standard  
145 deviation, so each component has mean zero and standard deviation of one. We then performed a  
146 binomial logistic regression — e.g. does the dialogue line belong to Penny or Sheldon ? — based on  
147 a linear prediction of the dialogue line  $i$ :

$$\beta_0 + \beta_1 u_{1,i} + \dots + \beta_n u_{n,i},$$

148 allowing to measure (using regression coefficients  $\{\beta_0, \dots, \beta_n\}$ ) how the the explanatory variables  
149  $u_{1,i}, \dots, u_{n,i}$ , impact the prediction. The fitted logistic regression is model is given by

$$P(\text{Sheldon}|\text{the } i\text{-th line is said by Sheldon or Penny}) = \frac{1}{1 + e^{-(\beta_0 + \beta_1 u_{1,i} + \dots + \beta_n u_{n,i})}}$$

150 where  $\beta_0$  determines the intercept (i.e. it is the outcome when all the other predictors variables are  
151 equal to zero). Each coefficient  $\beta_i$  estimates the additional effect of adding the corresponding variable  
152 to the model prediction.

153 The sign of the coefficient indicates the influence of the specific principal component on the probability  
154 it is a particular character. If the sign is positive then it is more likely to be that character (Penny  
155 in the example above) if the dialogue line has larger and more positive values of that component.  
156 Conversely, if the sign is negative that means it is less likely to be that character if the dialogue line  
157 has larger and more positive values of that component. The larger the magnitude of the coefficient,  
158 the more important the predictor variable is in making the prediction.

159 For each TV series, we proceed to a logistic regression with 300 first PCAs, for each possible pair  
160 of characters. We obtain a predictor function and evaluate the absolute value of each regression  
161 coefficient. We obtain the magnitude of each coefficient and therefore assess which coefficients have  
162 the most importance in the logistic regression. Afterwards we take the ten regression coefficients with  
163 the largest absolute value and plot them (see figure 3 and 8). From this analyse, we deduce which  
164 dimensions that have an impact on the character's prediction. To evaluate performance we calculate  
165 the AUC (Area Under The Curve) ROC (Receiver Operating Characteristics) curve to evaluate as a  
166 function of the dimensions.

### 167 2.3 Comparing to GPT4 and human expert

168 In order to test our method against a large language model we queried GPT4 with the following  
169 system prompt: *"You are expert on the TV series The Big Bang Theory. You are now being challenged  
170 to identify characters from the series. Try your best to do well. If you can beat another human expert  
171 there is a prize."* and a query that asked *"Tell me who was most likely out of Leonard and Sheldon  
172 (from the series Big Bang Theory) to have said the following line of dialogue: [DIALOGUE LINE].  
173 Now state the most likely character as a single word, either Leonard and Sheldon. Do not write  
174 anything else."* Character and TV series names were adjusted appropriately for each test. We tested  
175 four pairs (Penny/Sheldon, Leonard/Sheldon, Phoebe/Ross, Phoebe/Chandler). We first repeated the  
176 above procedure 100 times, 50 times for each character, to test the accuracy of the classification (i.e.  
177 proportion of correct answers).

178 We also provided the same dialogue lines to two motivated human experts (who had watched both  
179 series in their entirety two times, most recently within the last year) and expressed a determination to  
180 beat GPT4. Both participants were relatives of the co-authors of this article. The same dialogue lines  
181 on which GPT4 was tested, were presented in a random order in the spreadsheet file. The subjects  
182 were asked to guess the name of the character for each dialogue line, and write it into the spreadsheet.

## 183 3 Results

### 184 3.1 Qualitative analysis of the principal components

185 We started by plotting the embedded dialogue lines 'Big Bang Theory' in terms of the six most  
186 important principal components, in order to visualise the most distinguishing features of the dialogue.  
187 The first two of these (PCA1 and PCA2) are shown in figure 1aa. The nearest neighbour clustering  
188 then allows us to see where different dialogue lines are found in these dimensions. We can see that  
189 larger negative values of PCA1 corresponds to very short phrases (for example 'Uh' in the pink

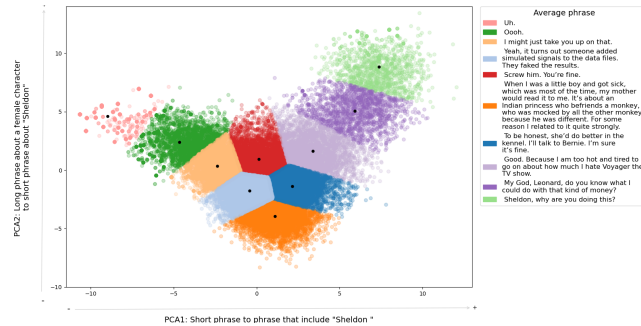

(a) Projection of PCA1 and PCA2

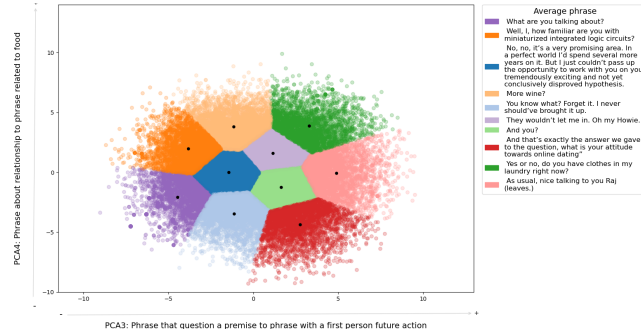

(b) Projection of PCA3 and PCA4

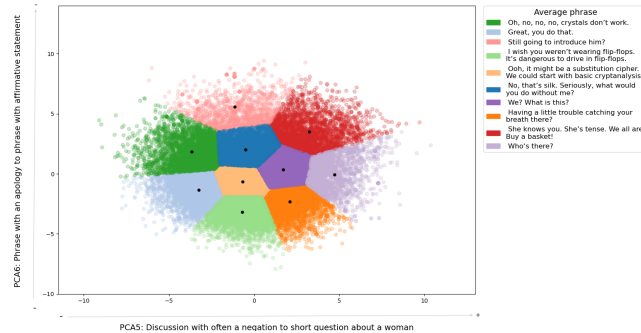

(c) Projection of PCA5 and PCA6

Figure 1: Projection of the first 6 PCAs. Each PCA has an interpretation from the qualitative analysis. Each plot has their respective cluster along with the average phrase of each cluster for The Big Bang Theory dialogue lines

190 cluster in the top left of the figure) and larger positive values of PCA1 correspond to phrases about  
 191 Sheldon (for example 'Sheldon, what do you expect us to do?' in the green cluster in the top right  
 192 of the figure). The qualitative analysis of PCA1 confirmed this pattern, with 'Yeah' being the most  
 193 extreme negative value and 'You know, I was thinking. Without Sheldon, most of us would have  
 194 never met, but Penny would still live across from him.' being the extreme positive value (see Annex  
 195 6 for a list of the ten most extreme positive and negative values of PCA1 and the other principal  
 196 components).

197 Following the same approach for PCA2, we found that the negative values are associated with long  
 198 phrases about a female characters an positive values with phrases about Sheldon. The most extreme  
 199 negative value is 'Well, there was the time I had my tonsils out, and I shared a room with a little  
 200 Vietnamese girl. She didn't make it through the night, but up till then, it was kind of fun.' and the  
 201 most extreme positive value is 'Leonard, Sheldon.'(see annex 6). The cluster values in figure 1a also  
 202 show the same pattern: with 'Indian princess who befriends a monkey who was mocked by all other  
 203 monkeys because he was different. For some reason I related to it quite strongly' in the orange cluster

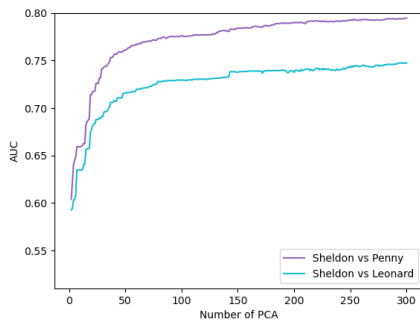

(a) The Big Bang Theory

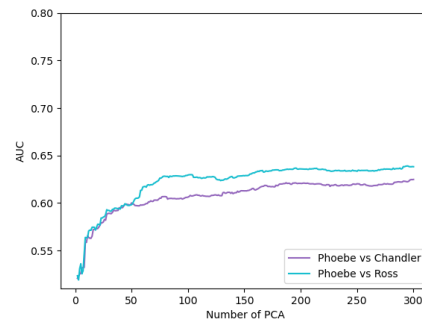

(b) Friends

Figure 2: AUC curves to assess the performance of the logistic regression, by increasing the number of dimensions, in the dialogue lines’s prediction for two different couples for the two Tv serie

204 at the bottom of figure 1a and ‘Sheldon, why are you doing this?’ in the light green cluster at the top  
 205 of the same figure.

206 A similar approach can be used to interpret figure 1b and c. PCA 3 ranges from phrase that questions  
 207 a premise (‘Really? I didn’t know that.’) to phrases with a first person future action (‘Aw, sweetie,  
 208 I’m comfortable around you, too.’). PCA 4 ranges from a phrase about relationship (‘Really? That  
 209 seems rather short sighted, coming from someone who is generally considered altogether unlikable.  
 210 Why don’t you take some time to reconsider?’) to a phrase related to eating out (‘Excellent! What  
 211 are you planning to wear?’). The fifth dimension is phrase with often a negation or counterargument  
 212 (like ‘Oh no, no, no, crystals don’t work’, which is green in figure 1) to a short question about a  
 213 woman (like ‘She knows you. She’s tense. We all are. Buy a basket!’), which is red in the same figure).  
 214 Finally, PCA 6 ranges from an apology (e.g. ‘I wish you weren’t wearing flip-flops. It’s dangerous to  
 215 drive in flip-flops’) to a phrase with affirmative statement( e.g. ‘Still going to introduce him?’). This  
 216 final interpretation is even clearer when we look at the extreme negative value (‘Relax, it wasn’t your  
 217 fault.’) and extreme positive value (‘Sure. I’d like to meet her.’). Overall, in The Big Bang Theory  
 218 the distinguishing characteristics of the principal components often relate to the characters views of  
 219 women. For Friends, there are also clear semantic differences in the sentences, although these appear  
 220 to be less gender stereotyped. We give a full analysis of the leading six components in annex 5.3.

221 When we plot the average position of the characters in the space of the first two components, the  
 222 differences are very small in comparison to the variation (figure 5 in annex 6). For example, while  
 223 there is a distance of 0.33 between Leonard and Amy on the PCA 1 axis, the standard deviation of  
 224 the values for the Leonard and Amy on that axis are 3.62 and 3.58, respectively. This observations  
 225 indicates that it is impossible to distinguish the characters in terms of just a single dimension. We do  
 226 note, though, that Friends characters are even closer together than The Big Bang Theory characters  
 227 (the PCA1 distance between Chandler and Rachel is 0.15 and between Chandler and Joey is 0.11,  
 228 while the standard deviations of Chandler, Rachel and Joey are respectively 3.62, 4.03 and 3.78). The  
 229 biggest difference we observed is between Penny and Sheldon.

### 230 3.2 Character prediction

231 While a small number of principal component dimensions is not sufficient to tell the characters apart,  
 232 can we use more of the dimensions to make the distinction? To test this we performed binomial logistic  
 233 regression on pairs of characters as a function of the number of principal components we included in  
 234 the model. The AUC values in figure 2a show a steady improvement in the predictions up to around  
 235 50 principal components for Big Bang Theory, after which only slight increases in performance are  
 236 obtained. Sheldon and Penny were easier to distinguish using this method than Sheldon and Leonard.  
 237 Figure 2b, shows that Friends characters were much more difficult to distinguish using this method.

238 If we view the principal component analysis as an attempt to capture the character’s personality by  
 239 their dialogue lines (as in the analysis by [32]) then we can say that the TV characters personality  
 240 have a dimension of somewhere between 50 and 100. Each new dimension gives a small extra insight

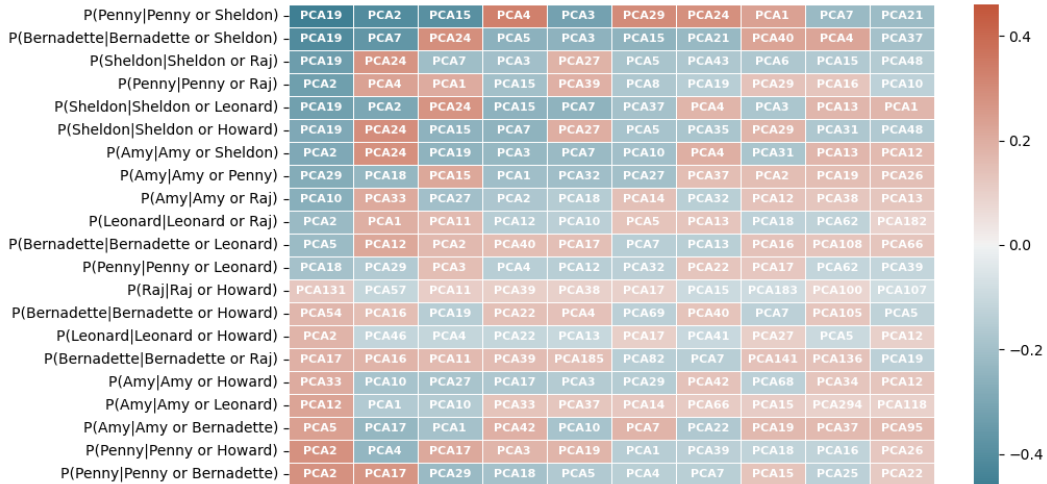

Figure 3: Regression coefficients for each possible character pairs for the TV series The Big Bang Theory. For each pair, we conduct a logistic regression to predict if the dialogue line is more likely to be said by a character1 such that  $P(\text{character1} = 1 | \text{the line is said by character1 or character2})$ . We use the first 300 principal components in the logistic regression. Then, we assess the absolute value of each coefficient to determine their magnitude. Following this, we select the top ten coefficients for each linear predictor function. We report in this figure those coefficients, along with their corresponding dimensions. The coefficients are in decreasing order from left to right: the left side have the coefficient with the highest magnitude, the right side have the coefficients with the lowest magnitude.

241 into the character differences. Since Friends characters are more difficult to predict from what they  
 242 say, we can conclude that Friends characters are less stereotyped than characters in The Big Bang  
 243 Theory.

244 We can investigate which PCA dimensions best distinguish characters by looking at the coefficients  
 245 of the binary regression. Figure 3 shows the ten most important components (determined by the  
 246 magnitude of the absolute value of the coefficients in the regression) for distinguishing the characters  
 247 dialogue lines in The Big Bang Theory. Each row represents a character pair, with the PCAs ordered  
 248 from left to right according to the magnitude of the coefficients. The first column corresponds to the  
 249 coefficient with the largest magnitude in the linear predictor function, the second column corresponds  
 250 to the second coefficient with the second largest magnitude, and so on.

251 As an example, the first row is the character prediction for the couple 'Penny and Shel-  
 252 don' should be read as considering the probability the dialogue line is by Penny, i.e.  
 253  $P(\text{Penny} = 1 | \text{the line is said by Penny or Sheldon})$ . The first cell entry, PCA19, is the coefficient in  
 254 the linear predictor function with the largest absolute value. Performing a qualitative analysis on  
 255 PCA19 (see annex 6) we find that negative coefficients correspond to lines about food and positive  
 256 coefficients correspond to lines about comics. In this case, the coefficient of the PCA19 is negative,  
 257 implying that if a dialogue line is about meal or food, it is more likely to be spoken by Penny than  
 258 Sheldon.

259 The most common occurring component in figure 3 is exactly this PCA 19 (food vs. comics) which  
 260 has 12 occurrences. PCA 2, which is long phrases about a female character versus phrases with one  
 261 name has 11 occurrences. PCA 7 has 11 occurrences and ranges from phrases with yes/no to question  
 262 about the current situation. The next most common occurring components are PCA4 (10 occurrences)  
 263 which ranges from an apology to phrase with affirmative statement; PCA15 (10 occurrences) ranging  
 264 from long phrases about a woman to short phrases about houses; PCA17 (9 occurrences) range from  
 265 short phrases about travel to long food related phrases; PCA5 (9 occurrences) which range from long  
 266 dialogue lines that express an opinion to short questions about a female character.

267 Figure 4 shows the relationship between the characters in terms of PCA19 (which distinguishes  
 268 dialogue lines about meal/food related from those about comics). The graph shows the magnitude of

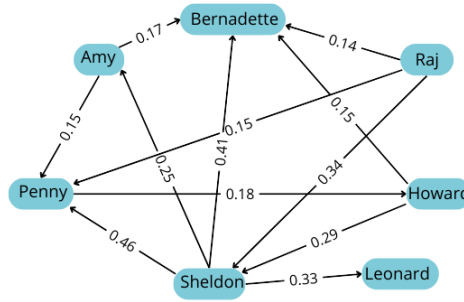

Figure 4: Relationship between characters in The Big Bang Theory in terms of PCA19 (that distinguishes lines about meal/food related from lines about comics). The value on the arrows show the magnitude of the coefficient. Only pairings where the absolute value of the regression coefficient is greater than 0.1 are included. The person at the start of the arrow talks about comics more than they talk about food compared to the person at the end of the arrow.

269 the coefficient and the direction of the arrow indicates that the coefficient is positive. For example, for  
 270 P(Penny|the line is said by Penny or Sheldon) the regression coefficient for the PCA19 is negative,  
 271 reflecting the fact that Penny talks more about food and Sheldon that talks more about comics, so  
 272 the arrow points from Sheldon to Penny. Similarly, we see that Bernadette talks more about food  
 273 than Raj, Howard Sheldon and Amy and thus the arrows point toward her. And Raj talks more about  
 274 comics than Penny, Bernadette and even Sheldon, so the arrows point out from him in the figure. In  
 275 the case of the TV series Friends, the magnitude of the regression coefficients are smaller than those  
 276 for The Big Bang Theory and a more varied number of components are represented (see annex 5.3).

277 While the method for constructing figure 4 can give an indication of how the components distinguish  
 278 the characters, we should bear in mind that in a regression of hundreds of variables (on which this  
 279 graph is based) the relationships established are not always straightforward. For example, in the  
 280 figure, we see that the respective models predict that Howard talks more about comics than Sheldon,  
 281 who talks more about comics than Penny, and Penny talks more about comics than Howard. This  
 282 inconsistency is likely due to other principal components distinguishing Penny and Howard better  
 283 than PCA19, and PCA19 acting as a counterbalance, to these additional components. A full analysis  
 284 of these relationships is beyond the scope of the current article.

### 285 3.3 Comparing to GPT4 and human expert

286 Initial prompting of GPT4 revealed that it has knowledge of the two TV series in its training data.  
 287 GPT4 replied that it "can provide information about the show, its characters, plot points, cultural  
 288 impact, and more". It was also able to provide motivation for its answers. For example, when we  
 289 asked if this dialogue line 'Okay, sweetie, I don't know if we're gonna have cookies, or he's just  
 290 gonna say hi, or really what's gonna happen, so just let me talk, and we'll. . .', it correctly answered  
 291 'Penny'. Then, when asked, it to explain why it draws conclusions about the characters, it cited  
 292 criteria "Context of Character Behavior", "Speech Patterns" and "Interaction Dynamics".

293 For the set of 100 dialogue lines, a direct prompt to GPT4 (see methods for details) was correct for  
 294 Penny versus Sheldon on 81 occasions, for Sheldon versus Leonard on 71 occasions, for Phoebe  
 295 versus Ross on 66 occasions, and for Phoebe versus Chandler on 65 occasions. For these same test  
 296 examples, the first human expert was correct on 71, 76, 67, and 59 occasions, respectively. The  
 297 second human expert was correct on 74, 72, 70, and 73 occasions. For comparison, the accuracy  
 298 (percentage correct over all sentences) for the 300 dimensional PCA model was 72.8%, 68.1%,  
 299 59.7% and 60.6% respectively. The standard error for a proportion of 70% is  $0.7 \cdot 0.3 \cdot 100 \approx 4.5\%$ ,  
 300 suggesting a comparable level of performance between the human experts and GPT4, and a slightly  
 301 lower level of performance for the 300 dimensional PCA model.



## 302 4 Conclusion

303 Our qualitative analysis highlights how, when interpreted by a human, the principal components of the  
304 embeddings reflect the meaning of the dialogue lines of TV series. Many of dimensions contributing  
305 to the prediction are related to female characters. This can be attributed to the fact that the TV series  
306 portrays very stereotypical characters, with the main protagonists portrayed as geeks, embodying  
307 various clichés associated with them. A number of previous studies have identified gender and racial  
308 stereotyping within the way models represent data [4, 2, 29], we have shown that these dimensions  
309 are also important in the predictions these models make. Friends, in which the characters might be  
310 considered to have smaller stereotyped (within-group) differences, was more difficult to predict using  
311 this method.

312 We have shown that given the principal components of the dialogue in a TV series, we are able to  
313 predict the characters personality using logistic regression, to a level of performance slightly below  
314 that of GPT4. We needed 50-100 dimensions in the logistic regression to predict a dialogue line in the  
315 TV series. This might be said to support the idea of a language model more like a stochastic parrot  
316 than a spark of AI, in the sense that a large part of the predictive skill of the model can be obtained by  
317 adding up the components of the word embeddings and providing an appropriate prediction. Indeed,  
318 we have used a much smaller embedding vector (384 dimensions) than GPT4 (several thousand  
319 dimensions) to achieve somewhat comparable results.

320 That said, there remain two things which GPT4 does which our model does not. Firstly, our analysis  
321 starts from the sentence embeddings. Taking these embeddings as given ignores the complex process  
322 by which these are generated through training in the first place [9, 30]. Secondly, we had to specify  
323 the problem we wanted to solve as a logistic regression problem and train on previous data. GPT4,  
324 on the other hand, requires no additional training step and, from the given prompt, can identify the  
325 requested character. In light of these limitations, we see our work as highlighting the need to be  
326 more specific about claims related to sparks of AI [22]. We have shown that prediction part of the  
327 question of identifying TV character personality is (to some degree) obtainable from linear models,  
328 the question then is where the supposed spark lies? Is it in the creation of embeddings or is it in  
329 GPT4’s ability to identify the prediction problem from the input provided by the user? We would  
330 suggest that further dissections of how these methods work, like we have done here for the prediction  
331 stage, can shed more light on these questions.

332 Our study is limited to a qualitative study of two very specific datasets. The contribution is primarily  
333 methodological. We propose an alternative to benchmark testing for understanding why a machine  
334 learning method works in the way it does, by comparing it to a method based on linear predictions.  
335 As such, it is a qualitative contribution to a larger debate around how to evaluate LLMs, rather than a  
336 quantitative demonstration of model performance.

## 337 References

- 338 [1] Rediet Abebe et al. “Roles for computing in social change”. In: *Proceedings of the 2020*  
339 *conference on fairness, accountability, and transparency*. 2020, pp. 252–260.
- 340 [2] Salter Anastasia and Blodgett Bridget. *Toxic Geek Masculinity in Media*. Springer, 2017.
- 341 [3] Emily M Bender et al. “On the dangers of stochastic parrots: Can language models be too big?”  
342 In: *Proceedings of the 2021 ACM conference on fairness, accountability, and transparency*.  
343 2021, pp. 610–623.
- 344 [4] Tolga Bolukbasi et al. “Man is to computer programmer as woman is to homemaker? debiasing  
345 word embeddings”. In: *Advances in neural information processing systems* 29 (2016).
- 346 [5] Tom B. Brown et al. *Language Models are Few-Shot Learners*. 2020. arXiv: 2005.14165  
347 [cs.CL].
- 348 [6] Sébastien Bubeck et al. “Sparks of artificial general intelligence: Early experiments with gpt-4”.  
349 In: *arXiv preprint arXiv:2303.12712* (2023).
- 350 [7] Nicholas Carlini et al. *Extracting Training Data from Large Language Models*. 2021. arXiv:  
351 2012.07805 [cs.CR].
- 352 [8] Evangelia Christodoulou et al. “A systematic review shows no performance benefit of machine  
353 learning over logistic regression for clinical prediction models”. In: *Journal of clinical*  
354 *epidemiology* 110 (2019), pp. 12–22.
- 355 [9] Jacob Devlin et al. *BERT: Pre-training of Deep Bidirectional Transformers for Language*  
356 *Understanding*. 2019. arXiv: 1810.04805 [cs.CL].
- 357 [10] Jinyan Fan et al. “How well can an AI chatbot infer personality? Examining psychometric  
358 properties of machine-inferred personality scores.” In: *Journal of Applied Psychology* 108.8  
359 (2023), p. 1277.
- 360 [11] William Fedus, Barret Zoph, and Noam Shazeer. *Switch Transformers: Scaling to Trillion*  
361 *Parameter Models with Simple and Efficient Sparsity*. 2022. arXiv: 2101.03961 [cs.LG].
- 362 [12] Michael Greenacre et al. “Principal component analysis”. In: *Nature Reviews Methods Primers*  
363 2.1 (2022), p. 100.
- 364 [13] Hongzhao Huang and Fuchun Peng. *An Empirical Study of Efficient ASR Rescoring with*  
365 *Transformers*. 2019. arXiv: 1910.11450 [cs.CL].
- 366 [14] Dan Jurafsky and James H. Martin. *Speech and Language Processing*. URL: <https://web.stanford.edu/~jurafsky/slp3/>.
- 368 [15] Jared Kaplan et al. “Scaling laws for neural language models”. In: *arXiv preprint*  
369 *arXiv:2001.08361* (2020).
- 370 [16] Sayash Kapoor and Arvind Narayanan. “Leakage and the reproducibility crisis in machine-  
371 learning-based science”. In: *Patterns* 4.9 (2023).
- 372 [17] Michal Kosinski et al. “Mining big data to extract patterns and predict real-life outcomes.” In:  
373 *Psychological methods* 21.4 (2016), p. 493.
- 374 [18] Martha Lewis and Melanie Mitchell. “Using counterfactual tasks to evaluate the generality of  
375 analogical reasoning in large language models”. In: *arXiv preprint arXiv:2402.08955* (2024).
- 376 [19] Dejan Markovikj et al. “Mining facebook data for predictive personality modeling”. In: *Pro-*  
377 *ceedings of the international AAAI conference on Web and social media*. Vol. 7. 2. 2013,  
378 pp. 23–26.
- 379 [20] Tomas Mikolov et al. *Distributed Representations of Words and Phrases and their Composi-*  
380 *tionality*. 2013. arXiv: 1310.4546 [cs.CL].
- 381 [21] OpenAI. *Embeddings*. URL: <https://platform.openai.com/docs/guides/embeddings/embedding-models>.
- 383 [22] OpenAI et al. *GPT-4 Technical Report*. 2024. arXiv: 2303.08774 [cs.CL].
- 384 [23] F. Pedregosa et al. “Scikit-learn: Machine Learning in Python”. In: *Journal of Machine*  
385 *Learning Research* 12 (2011), pp. 2825–2830.
- 386 [24] Jeffrey Pennington, Richard Socher, and Christopher Manning. “GloVe: Global Vectors for  
387 Word Representation”. In: *Proceedings of the 2014 Conference on Empirical Methods in*  
388 *Natural Language Processing (EMNLP)*. Ed. by Alessandro Moschitti, Bo Pang, and Walter  
389 Daelemans. Doha, Qatar: Association for Computational Linguistics, Oct. 2014, pp. 1532–  
390 1543. DOI: 10.3115/v1/D14-1162. URL: <https://aclanthology.org/D14-1162>.

- 391 [25] Alec Radford et al. “Language models are unsupervised multitask learners”. In: *OpenAI blog*  
392 1.8 (2019), p. 9.
- 393 [26] Nils Reimers and Iryna Gurevych. “Sentence-BERT: Sentence Embeddings using Siamese  
394 BERT-Networks”. In: *Proceedings of the 2019 Conference on Empirical Methods in Natural*  
395 *Language Processing*. Association for Computational Linguistics, Nov. 2019. URL: <https://arxiv.org/abs/1908.10084>.  
396
- 397 [27] Ashish Vaswani et al. “Attention is All you Need”. In: *Advances in Neural Informa-*  
398 *tion Processing Systems*. Ed. by I. Guyon et al. Vol. 30. Curran Associates, Inc., 2017.  
399 URL: [https://proceedings.neurips.cc/paper\\_files/paper/2017/file/3f5ee243547dee91fbd053c1c4a845aa-Paper.pdf](https://proceedings.neurips.cc/paper_files/paper/2017/file/3f5ee243547dee91fbd053c1c4a845aa-Paper.pdf).  
400
- 401 [28] Ashish Vaswani et al. “Tensor2Tensor for Neural Machine Translation”. In: *Proceedings*  
402 *of the 13th Conference of the Association for Machine Translation in the Americas (Vol-*  
403 *ume 1: Research Track)*. Ed. by Colin Cherry and Graham Neubig. Boston, MA: Asso-  
404 ciation for Machine Translation in the Americas, Mar. 2018, pp. 193–199. URL: <https://aclanthology.org/W18-1819>.  
405
- 406 [29] Laura Weidinger et al. “Taxonomy of risks posed by language models”. In: *Proceedings of the*  
407 *2022 ACM Conference on Fairness, Accountability, and Transparency*. 2022, pp. 214–229.
- 408 [30] Thomas Wolf et al. *HuggingFace’s Transformers: State-of-the-art Natural Language Process-*  
409 *ing*. 2020. arXiv: 1910.03771 [cs.CL].
- 410 [31] Linting Xue et al. *mT5: A massively multilingual pre-trained text-to-text transformer*. 2021.  
411 arXiv: 2010.11934 [cs.CL].
- 412 [32] Wu Youyou, Michal Kosinski, and David Stillwell. “Computer-based personality judgments  
413 are more accurate than those made by humans”. In: *Proceedings of the National Academy of*  
414 *Sciences* 112.4 (2015), pp. 1036–1040.

415 **5 Annex1 : Supplementary material**

416 **5.1 Average Position for each main character of the two Tv series**

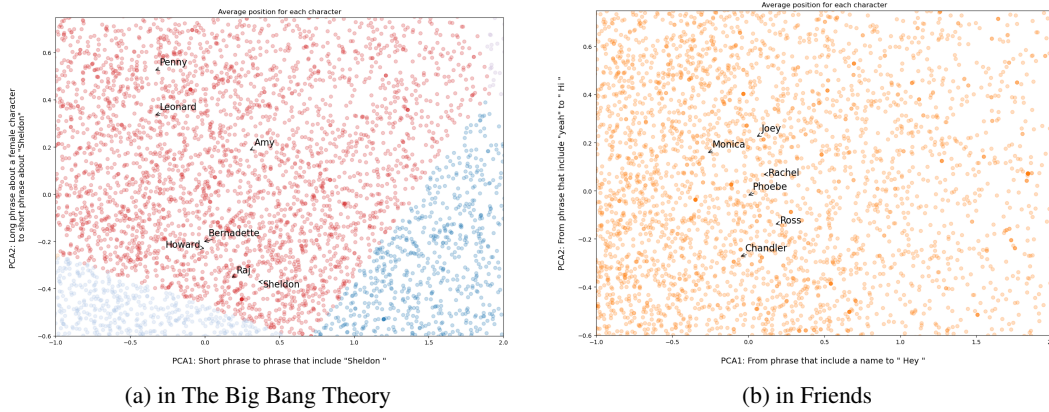

Figure 5: Projection of the two first PCAs, and their respective interpretation, with the average position for each main character of the two Tv series

417 **5.2 Accuracy curves the two Tv serie**

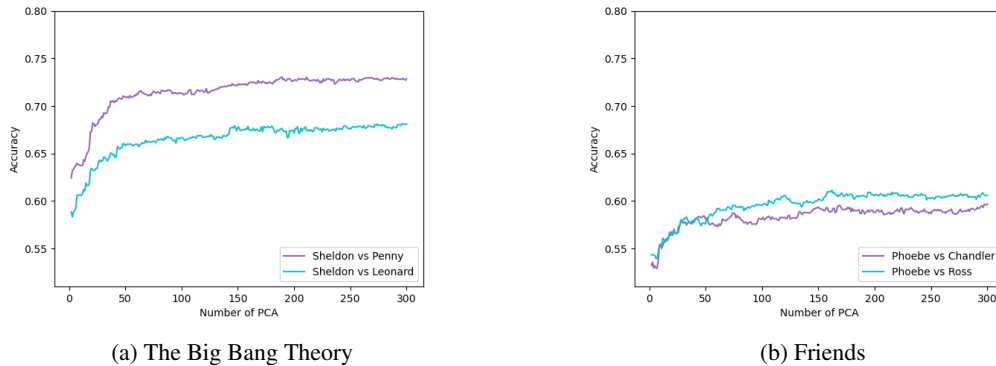

Figure 6: Accuracy curves to assess the performance of the logistic regression, by increasing the number of dimensions, in the dialogue lines's prediction for two different couples for the two Tv serie

418 **5.3 Friends Analysis**

419 For Friends, we analyse similarly the 6 first dimensions as seen in Figure 7. The PCA1 is interpreted  
 420 as phrase that include a name to 'Hey'. This is illustrate with the figure 7a by the dark blue cluster in  
 421 the left with the average phrase 'Ms. Monroe... Oh there you go', for the negative larger values of the  
 422 PCA1, and by the red cluster on the top right with average phrase 'Hey' for the positive larger values  
 423 of the PCA1. The qualitative analysis, in annex 7, gives as the most extreme negative value of the  
 424 PCA1 the phrase 'Yeah. It's just gonna be too hard. Y'know? I mean, it's Ross. How can I watch  
 425 him get married? Y'know it's just, it's for the best, y'know it is, it's... Y'know, plus, somebody's got  
 426 to stay here with Phoebe! Y'know she's gonna be pretty big by then, and she needs someone to help  
 427 her tie her shoes; drive her to the hospital in case she goes into labour.'. The most extreme positive  
 428 value of the PCA1 is 'Hey'. The qualitative confirm our earlier statement about the interpretation of  
 429 the PCA1.

430 The PCA2 is phrase that include 'yeah' to 'Hi'. The negative values of the PCA2 can be found on the  
 431 figure 7a, for example from the light green cluster of at the bottom left, with average phrase 'Um,

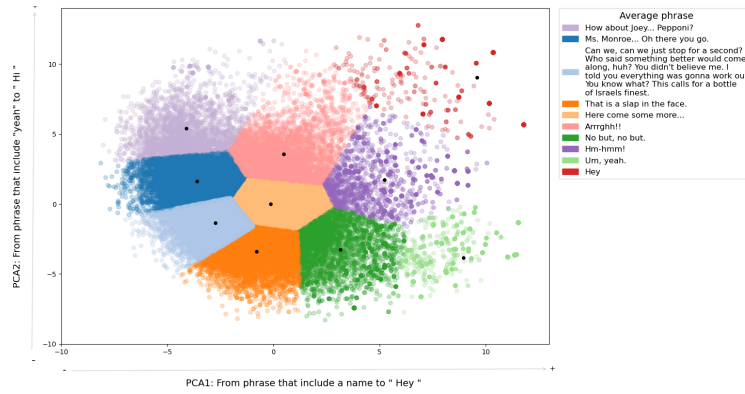

(a) Projection of PCA1 and PCA2

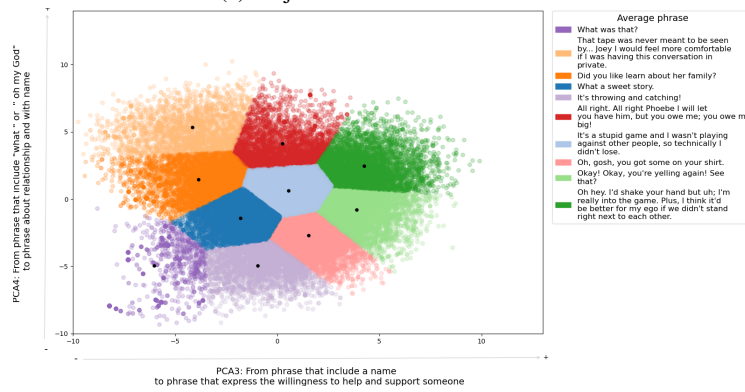

(b) Projection of PCA3 and PCA4

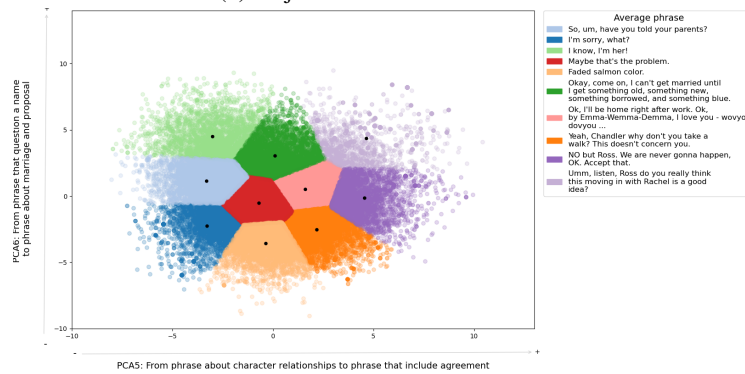

(c) Projection of PCA5 and PCA6

Figure 7: Projection of the first 6 PCAs. Each PCA has an interpretation from the qualitative analysis. Each plot has their respective cluster along with the average phrase of each cluster for Friends dialogue lines

432 yeah.', and the positive value are on the top red cluster with average phrase 'Hey'. It is confirm from  
433 the qualitative analysis in annex 7, give the most extreme negative value 'Yeah, fair enough.' and the  
434 most extreme positive value 'Hey! Hi!'.

435 The PCA3 is phrase that express the willingness to help and support someone to phrase that include a  
436 name. The projected values of the PCA3 are on the figure 7b, the negative values are on the left of the  
437 graph, for example, the orange cluster with average phrase 'Did you like learn about her family?'. In  
438 regards of the positive values, they are on the right of the graph, for example the light green cluster  
439 with average phrase 'Okay! Okay, you're yelling again! See that?'. The qualitative analysis, see  
440 annex 7, shows the most extreme negative value of the PCA3 is 'Phoebe?! Wait a-but-but she just,  
441 she said that Joey was her backup.' and the most extreme positive value is 'Hi! I'm back. Yeah, that  
442 sounds great. Okay. Well, we'll do it then. Okay, bye-bye.'

443 The PCA4 interpretation is about phrase that include 'what' or 'oh my God', for example in the  
444 figure 7b in the dark purple cluster in the bottom left with average phrase 'What was that?', to phrase  
445 about relationship and with the name, for example in the figure 7b with the dark green cluster with  
446 average phrase 'Oh hey, I'd shake your hand but uh: I'm really into the game. Plus, I think it'd be  
447 better for my ego if we didn't stand right to each other.'. The qualitative analysis, in annex 7, confirm  
448 our statement with the following most extreme negative value 'What?! What is it?!'. and the most  
449 extreme positive value 'Well it's okay. Chandler is talking to her.'

450 PCA5 is phrase about character relationship to phrase that include agreement. As seen in the figure  
451 7c, the negative value of PCA5 are represented on the graph on the left, for example with the light  
452 blue cluster with average phrase 'So, um, have you told your parents?'. The positive value of PCA5  
453 are on the right of the figure 7c, as we can pick out from the dark purple cluster with average phrase  
454 'No, but Ross. We are never gonna happen, OK. Accept that.'. The qualitative analysis verify our  
455 interpretation, in annex 7, we see that the most extreme negative value is the phrase 'But, also, what  
456 happened between you and your Mom?'. and the most extreme positive value is 'Yeah! That would be  
457 great!'.

458 We interpret the PCA6 as phrase that question a name to phrase about marriage and proposal. The  
459 PCA6 projection is illustrate in the figure 7c, with negative values as the bottom, with for example  
460 the cluster dark orange with average phrase 'Yeah, Chandler why don't you take a walk? This doesn't  
461 concern you.'. The positive value of the PCA6 are in the top of the graph, for example dark green  
462 cluster with average phrase 'Okay, come on, I can't get married until I get something old, something  
463 new, something borrowed, and something blue'. Our statement confirmed by the qualitative analysis,  
464 in annex 7, with the most extreme negative value is the phrase 'Wait a minute. What's his name?'  
465 and the most extreme positive value is the phrase 'Yes! We're getting married?!'.

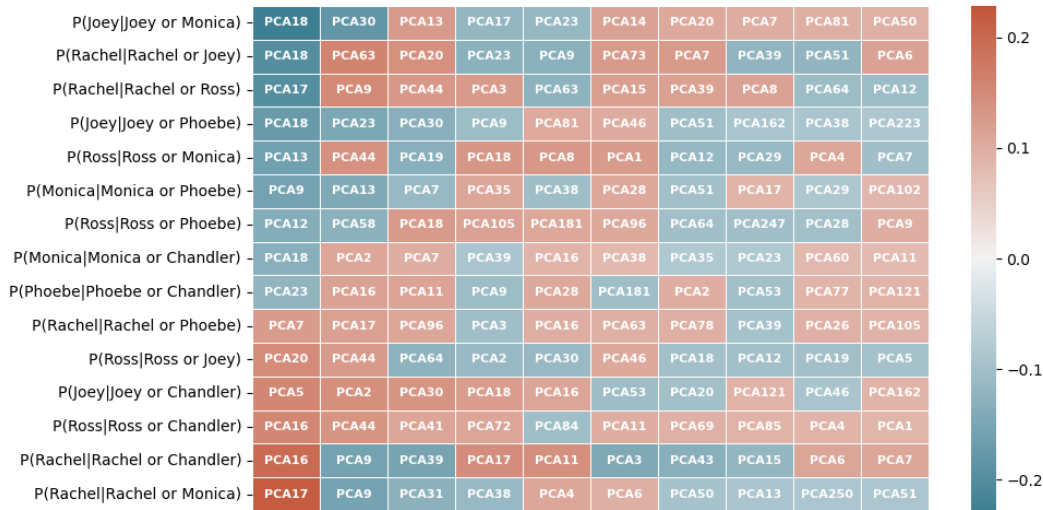

Figure 8: Regression coefficients for each possible character pairs for the TV series Friends. For each pair, we conduct a logistic regression to predict if the dialogue line is more likely to be said by a character1 such that  $P(\text{character1} = 1 | \text{the line is said by character1 or character2})$ . We use the first 300 principal components in the logistic regression. Then, we assess the absolute value of each coefficient to determine their magnitude. Following this, we select the top ten coefficients for each linear predictor function. We report in this figure those coefficients, along with their corresponding dimensions. The coefficients are in decreasing order from left to right: the left side have the coefficient with the highest magnitude, the right side have the coefficients with the lowest magnitude. The rows are arranged such that the first row (the most significant coefficients) is in increasing order

466 In the case of the TV series Friends, in the figure 8, the first column are the most significant regression  
 467 coefficient for each pair. We can notice that the most extreme negative value is in the first row  
 468 and belongs to the regression coefficient of the character’s dialogue lines prediction between Joey  
 469 and Monica. The probability is as follow,  $P(\text{Joey} = 1 | \text{the line is said by Joey or Monica}) = p$  and  
 470  $P(\text{Monica} = 0 | \text{the line is said by Joey or Monica}) = 1 - p$ . The corresponding dimension of the  
 471 first coefficient is the PCA 18, it depicts phrase from ‘Oh no’ to phrase that include ‘yeah’ or  
 472 ‘look’ (see qualitative analysis in annex ??). In other words, a phrase that include ‘Oh no’ is more  
 473 likely from Joey. The most extreme positive value in this first column appears in the last row,  
 474 corresponding to the regression coefficients for predicting dialogue lines between the pair ‘Rachel  
 475 and Monica’. The probability is such that  $P(\text{Rachel} = 1 | \text{the line is said by Rachel or Monica}) = p$   
 476 and  $P(\text{Monica} = 0 | \text{the line is said by Rachel or Monica}) = 1 - p$ . The coefficient correspond to the  
 477 dimension PCA17: from phrase that include ‘Joey’ to phrase that include ‘Ross’. We can deduce that,  
 478 if a phrase include ‘Ross’ it is more likely from Rachel.

|        |               |                                                                                    |
|--------|---------------|------------------------------------------------------------------------------------|
| PCA 9  | 8 occurrences | From phrase that include ‘Oh’,<br>to question about what the people has been doing |
| PCA 18 | 8 occurrences | From ‘Oh no’<br>to phrase that include ‘yeah’ or ‘look’                            |
| PCA 7  | 7 occurrences | From phrase which is an answer a statement<br>to ‘What?’                           |
| PCA 17 | 6 occurrences | From phrase that include ‘Joey’<br>to phrase that include ‘Ross’                   |
| PCA 16 | 6 occurrences | From phrase about a statement on a character<br>to question with ‘What’            |

Table 1: Interpretation of the most important dimension in the dialogue lines prediction in Friends, with the number of time they occurs in the figure 8

479 For Friends, we also count the occurrences of each PCA from the figure 8, and then interpret them.  
 480 We recapitulate the information in the table 1. Contrary to The Big Bang Theory the phrases in  
 481 Friends are much shorter, more exclamatory, and there are less obvious topic like food or comics.

482 In the TV series Friends, we note fewer instances of the main principal component analysis. For  
 483 instance, in The Big Bang Theory, PCA19 occurs most frequently, appearing 12 times. However, in  
 484 Friends, PCA9 and PCA18 are the most common dimensions, each occurring 8 times. If we count the  
 485 number of different PCA in figure 3 for The Big Bang Theory we obtain 59, and 56 different PCA for  
 486 Friends in the figure 8. The number of dimension is similar in both case, but we can pick out that the  
 487 magnitude of the coefficient is slightly higher in The Big Bang Theory than in Friends. Since the TV  
 488 serie Friends has less occurrences of the main PCAs, smaller magnitude in the regression coefficients  
 489 and less AUC accuracy, therefore more dimension are needed into the dialogue line predictions. This  
 490 is visible on the figure 5, where we can see that average position of the character in Friends are more  
 491 closer than the average position of the character in The Big Bang Theory.

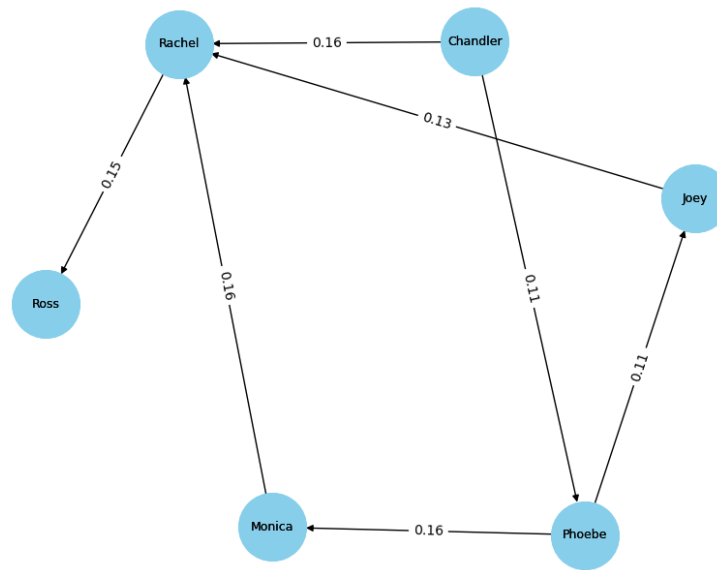

Figure 9: Relationship between characters in Friends for the dimension that occurs the most in Figure 9 (PCA9) with phrase that include 'Oh', to question about what the people has been doing. The person at the start of the arrow ask more about what the people has been doing more than they have phrase that include 'Oh' to the person at the end of the arrow.

492 In the figure 9, we show the relationship between the character of Friends for the PCA9, the  
 493 dimension that have the most occurrences, it is interpret as with phrase that include 'Oh' to question  
 494 about what the people has been doing. For example, in the dialogue lines prediction  $P(\text{Rachel} = 1 | \text{the line is said by Rachel or Ross})$ , the regression coefficient is positive, then if it is a question  
 495 about what the people has been doing, it is more likely from Rachel, and if it is a phrase that include  
 496 'Oh', then it is more likely to be from Ross. Then the arrow goes from Rachel to Ross. If the  
 497 regression coefficient is negative, for example when we want to predict a dialogue line such that  
 498  $P(\text{Rachel} = 1 | \text{the line is said by Rachel or Joey})$ , then if a phrase include 'Oh' it is more likely to  
 499 be said by Rachel, and if it is a question about what the people has been doing, it is more likely from  
 500 Joey. The arrows goes from Joey to Rachel.  
 501



502 **6 Annex 2: Dialogue example of The Big Bang Theory**

503 **6.1 PCA1**

504 **6.1.1 Lowest coefficient**

505 SHELDON : Yeah.

506 LEONARD : Yeah.

507 LEONARD : Yeah.

508 LEONARD : Yeah.

509 SHELDON : Yeah.

510 LEONARD : Yeah.

511 PENNY : Yeah.

512 PENNY : Yeah.

513 PENNY : Yeah.

514 SHELDON : Yeah.

515 **6.1.2 Highest coefficient**

516 BERNADETTE : You know, I was thinking. Without Sheldon, most of us would have  
517 never met, but Penny would still live across from him.

518 AMY : Which couldn't have happened if you didn't live across the hall from her, which  
519 couldn't have happened without Sheldon. Same goes with you guys. If Leonard  
520 wasn't with Penny, she never would have set you up.

521 PENNY : Oh, my God, Sheldon the genius is jealous of Leonard.

522 HOWARD : Now, I never thought I'd say this, but I'm kind of excited to see Sheldon.

523 AMY : This isn't about me and Sheldon. This is about Rajesh moving in with Leonard  
524 and Penny.

525 RAJ : It's a human emotion, Sheldon. Everyone gets jealous. I'm jealous of Leonard  
526 and Penny and Howard and Bernadette for being in such happy relationships.

527 LEONARD : Oh, come on. Sheldon, have you ever once heard me say that I don't trust  
528 Penny? Sheldon? Where did he go?

529 PENNY : Well, yeah, he'd been living with Sheldon.

530 LEONARD : Really. Who do you think did that, Sheldon?

531 AMY : Well, I was hoping the next person I dated would be a little less like Sheldon.

532 **6.2 PCA2**

533 **6.2.1 Lowest coefficient**

534 AMY : Well, there was the time I had my tonsils out, and I shared a room with a little  
535 Vietnamese girl. She didn't make it through the night, but up till then, it was kind  
536 of fun.

537 BERNADETTE : Because it would make you seem like something she already thinks you  
538 are.

539 BERNADETTE : You don't think she'd actually send you something gross or dangerous,  
540 do you?

541 LEONARD : Too expensive. You'd think I'd be used to women withholding their love. I  
542 mean, my mother did. I mean, no matter how hard I tried, she just didn't have any  
543 interest in me.

544 LEONARD : I mean, I know she's not my girlfriend or anything, but wouldn't you think  
545 she'd feel a little bad that I'm going to be gone for the whole summer?

546 SHELDON : Or you might think she thinks you think it's a date even though she doesn't.

547 LEONARD : Yeah, yeah, that's the fun part. We're also getting new curtains for my  
548 bedroom, and a dust ruffle, and a duvet, and I don't even know what a duvet is  
549 but I'm pretty sure if I did I wouldn't want one, but every time I talk to her about  
550 moving out she cries and we have sex.

551 AMY : Parental pressure can be daunting. I remember the battle with my mother about  
552 shaving my legs. Last year, I finally gave in and let her do it.

553 LEONARD : Don't you think if a woman was living with me I'd be the first one to know  
554 about it?

555 SHELDON : I was hoping she might listen to you about the dangers of owning unhygienic  
556 furniture.

## 557 **6.2.2 Highest coefficient**

558 LEONARD : Leonard, Sheldon.

559 LEONARD : Hi, I'm Leonard, this is Sheldon.

560 HOWARD : What about Sheldon?

561 LEONARD : Sheldon...

562 LEONARD : Sheldon...

563 LEONARD : Sheldon...

564 LEONARD : Sheldon...

565 HOWARD : Sheldon.

566 LEONARD : Sheldon.

567 HOWARD : Sheldon.

## 568 **6.3 PCA3**

### 569 **6.3.1 Lowest coefficient**

570 SHELDON : Really? I didn't know that.

571 PENNY : Did they make a movie about it?

572 RAJ : How did that even happen? Did they know that's what they were doing when they  
573 were doing it?

574 HOWARD : Yeah, I saw it on Mythbusters.

575 BERNADETTE : Do they have that?

576 SHELDON : A more plausible explanation is that his work in robotics has made an  
577 amazing leap forward.

578 SHELDON : Oh. Is it true they used scuba gear to create the sound of Darth Vader  
579 breathing?

580 HOWARD : Not exactly. They spent a ton of money developing this dandruff medication  
581 that had the side effect of horrible anal leakage.

582 SHELDON : It's been around for 25 years, and has been extensively corroborated by  
583 other researchers.

584 RAJ : Did he get superpowers?

### 585 **6.3.2 Highest coefficient**

586 PENNY : Aw, sweetie, I'm comfortable around you, too.

587 LEONARD : Great. Just relax and enjoy. Tonight is all about you.

588 SHELDON : Thank you, but I'll be fine.

589 PENNY : Okay, well, we'll talk to you guys later. Bye. She said not to come. It's gonna  
590 be a while.

591 SHELDON : Fine, let's go. Thank you for letting me sleep on your couch.

592 SHELDON : Oh, well, you two sit down and get to know each other. I'll get your room  
593 ready.

594 AMY : I will. I wish you were here.

595 LEONARD : Let's go. Okay, you two, just, have a nice... whatever this is.

596 PENNY : All right. Well, you guys have fun. I guess I'll see you Sunday night.

597 LEONARD : Yeah, no, I'm fine. It's good, it's a good party, thanks for having us, it's just  
598 getting a little late so...

## 599 **6.4 PCA4**

### 600 **6.4.1 Lowest coefficient**

601 SHELDON : Really? That seems rather short sighted, coming from someone who is  
602 generally considered altogether unlikable. Why don't you take some time to  
603 reconsider?

604 SHELDON : Yes, and she's not taking my feelings into account at all. Maybe it's time I  
605 teach her a lesson.

606 AMY : No, we're sorry. We never should have been comparing relationships in the first  
607 place.

608 HOWARD : Yeah, she was dating this guy, and I was kind of a jerk to her about it.

609 SHELDON : Yeah, but to be fair, he only said the part about him getting sick of you.

610 SHELDON : Oh, you're right. I could never be with a woman whose self-esteem was so  
611 low she'd be with Leonard.

612 SHELDON : Not true. No, look at me. I had an engagement ring to give a girl, and  
613 instead, she rejected me. And am I emotional about that? No. No, I am sitting  
614 here on a couch, talking about my favourite TV character like nothing happened.  
615 'Cause I am just like him, all logical, all the time.

616 SHELDON : It hurts that you would lie to me, Amy. I thought our relationship was based  
617 on trust and a mutual admiration that skews in my favour.

618 PENNY : Okay, I have not tried to change Leonard. That's just what happens in relation-  
619 ships. Look how much Amy's changed you.

620 PENNY : I get that, okay? It's just, Leonard and I have been married for two years, and  
621 we're no further along than when we were dating.

### 622 **6.4.2 Highest coefficient**

623 SHELDON : Excellent! What are you planning to wear?

624 HOWARD : In our new minivan. Hey, what's for lunch?

625 BERNADETTE : Where are you guys going to eat?

626 PENNY : What beverage do you make for that?

627 SHELDON : Oh, I have quite the evening planned. Our foetus-friendly festival of fun  
628 begins with an in-depth look at the world of model trains, and then we'll kick  
629 things up a notch and explore all the different ways that you can make toast.

630 LEONARD : What are you drinking there? A little eggnog?

631 RAJ : Sounds great!

632 SHELDON : In here, you'll find emergency provisions. An eight-day supply of food and  
633 water, a crossbow, season two of Star Trek: The Original Series on a high-density  
634 flash drive.

635 AMY : I'm going to the vending machine. Do you want anything?

636 SHELDON : Greetings, gentlemen. How goes your little project?

## 637 **6.5 PCA5**

### 638 **6.5.1 Lowest coefficient**

639 BERNADETTE : Absolutely. All we need to do is spend a little time and find something  
640 you're passionate about.

641 PENNY : Okay, a simple yes will do.

642 BERNADETTE : Of course you can. But maybe a good rule would be to wait for people  
643 to bring it up.

644 RAJ : No, no, it's a very promising area. In a perfect world I'd spend several more  
645 years on it. But I just couldn't pass up the opportunity to work with you on your  
646 tremendously exciting and not yet conclusively disproved hypothesis.

647 LEONARD : Sheldon, I think this will work. Let's just try it my way.

648 LEONARD : If that's what you want to do, yes.

649 HOWARD : Yeah, this is a bad idea. We should go.

650 AMY : Of course. I get to be part of the first team to use radon markers to map the  
651 structures that. . .

652 PENNY : Yeah. And there are a few things we need to stay on top of. So we thought it  
653 would useful, and I can't believe I'm about to say this, um.

654 LEONARD : No, I don't want to do it. You can do it.

### 655 **6.5.2 Highest coefficient**

656 HOWARD : How was she?

657 LEONARD : When was the last time you saw her?

658 LEONARD : How's your mom holding up?

659 AMY : Oh. What was her name?

660 LEONARD : How's she doing?

661 BERNADETTE : It was your mom.

662 LEONARD : Aw. What's wrong with her?

663 HOWARD : My mom died.

664 SHELDON : What's her name?

665 HOWARD : So, what is she doing today?

666 **6.6 PCA6**

667 **6.6.1 Lowest coefficient**

668 LEONARD : Relax, it wasn't your fault.

669 HOWARD : I'm sorry, too. It's all my fault.

670 AMY : Well, I didn't, and it's your fault.

671 PENNY : I'm sorry I yelled at you. It's not your fault.

672 LEONARD : It's not your fault.

673 AMY : It's not your fault.

674 SHELDON : It's simple biology. There's nothing I can do about it.

675 HOWARD : Look, I have felt terrible about this for years, and I'm glad I have the  
676 opportunity to tell you just how sorry I am.

677 LEONARD : This time, it's your fault.

678 LEONARD : Well, that's not your fault.

679 **6.6.2 Highest coefficient**

680 LEONARD : Sure. I'd like to meet her.

681 LEONARD : Will Amy be joining us for dinner?

682 BERNADETTE : Maybe, if she asks.

683 HOWARD : Sure she would. Ma, do you mind if Bernadette stays here this weekend?

684 LEONARD : No, no, of course not. Just have your relationship someplace else.

685 SHELDON : I'm going to find her and ask her to marry me. And if she says yes, we can  
686 put this behind us and resume our relationship. And if she says no, well, then she  
687 can just ponfo miran.

688 HOWARD : Yes!

689 HOWARD : Yes!

690 HOWARD : Yes!

691 HOWARD : Yes!

692 **6.7 PCA19**

693 **6.7.1 Highest coefficient**

694 SHELDON : Yes. Oh, I'm so excited. And I just can't hide it.

695 PENNY : I do, it's just he wants to go to that party at the comic book store. A lot of the  
696 guys that hang out there are kind of creepy.

697 LEONARD : Oh, I'm just trying to find the stupid next of kin to this stupid video store  
698 owner so I can return the DVD and see the look on Sheldon's stupid face when he  
699 sees that I didn't let this get to me.

700 HOWARD : Ooh, I want to go to the comic book store. (He leaves.)

701 PENNY : Yeah, but those tickets only get him into Comic-Con. That dress gets me into  
702 anywhere I want.

703 PENNY : No, come on, it's going to be fun, and you all look great, I mean, look at you,  
704 Thor, and, oh, Peter Pan, that's so cute.

705 BERNADETTE : Is it me, or is there something fun about watching him just float there?

706 HOWARD : Come on, Sheldon, there's so few places I can wear my jester costume.  
707 RAJ : So, listen to what he wrote. Uh, I saw you play at the comic book store. You guys  
708 rock. And then there's an animated smiley face raising the roof like this.  
709 SHELDON : Oh no! (He is also wearing a Flash costume.)

## 710 **6.7.2 Lowest coefficient**

711 SHELDON : We can't have Thai food, we had Indian for lunch.  
712 SHELDON : It was a Monday afternoon. You joined us for Indian food.  
713 SHELDON : Good morning, Friend Howard. Friend Raj. I see you gentlemen are  
714 enjoying beverages. Perhaps they would taste better out of these.  
715 RAJ : My stomach. Indian food doesn't agree with me. Ironic, isn't it?  
716 LEONARD : Well the only way we can play teams at this point is if we cut Raj in half.  
717 LEONARD : I've always been a little confused about this. Why don't Hindus eat beef?  
718 RAJ : Of course, but it's all Indian food. You can't find a bagel in Mumbai to save your  
719 life. Schmear me.  
720 SHELDON : Yeah, I actually have information about Raj that would be helpful with this  
721 discussion.  
722 RAJ : We Indians invented them. You're welcome.  
723 LEONARD : Here's an idea, why don't we just go out for Indian food.

## 724 **6.8 PCA7**

### 725 **6.8.1 Highest coefficient**

726 RAJ : He's gonna be here any second, what should we do?  
727 PENNY : What are you guys gonna do?  
728 LEONARD : What are we gonna do?  
729 HOWARD : What are we gonna do?!  
730 AMY : What's going on with him?  
731 LEONARD : What are we going to do?  
732 RAJ : So what are we going to do tonight?  
733 LEONARD : What's with him?  
734 HOWARD : What's with him?  
735 PENNY : What's with him?

### 736 **6.8.2 Lowest coefficient**

737 PENNY : Oh, Sheldon, are these letters from your grandmother?  
738 PENNY : I do, and you know, I don't think I've ever thanked you properly for helping  
739 me get it.  
740 SHELDON : Oh, yes. In fact, I improved upon it.  
741 SHELDON : No, of course not. No, I used trickery and deceit.  
742 LEONARD : Yeah, no, I do, I use those... uh... just to polish up my... spear-fishing  
743 equipment. I spear fish. When I'm not crossbow hunting, I spear fish. Uh, Penny,  
744 this is Sheldon's twin sister, Missy. Missy, this is our neighbour Penny.  
745 LEONARD : Yes, I've always admired that about you.

746 PENNY : She was right, you know. The locus of my identity is totally exterior to me.  
747 LEONARD : Oh, yes. Indeed, I did.  
748 LEONARD : No, no, I'm good. If my P.E. teachers had told me this is what I was training  
749 for, I would have tried a lot harder.  
750 RAJ : Do you kind of look like a shiny Sheldon?

## 751 **6.9 PCA15**

### 752 **6.9.1 Highest coefficient**

753 BERNADETTE : Yeah. You're inviting him into your home. It's intimate. It's where your  
754 underpants live.  
755 RAJ : It's a lease.  
756 LEONARD : What was I supposed to do? He needed a place to sleep it off.  
757 LEONARD : Ask him for a napkin, I dare you. (There is a knock on the door.) I'll get it.  
758 RAJ : He probably just goes to the bathroom.  
759 HOWARD : Maybe the problem is he thinks you're available. Does he know you're  
760 dating Sheldon?  
761 LEONARD : What if he lives in your garage?  
762 HOWARD : How'd you get him to come to your house?  
763 BERNADETTE : What are you going to do? Doesn't he know you have a boyfriend?  
764 LEONARD : He's in his bedroom.

### 765 **6.9.2 Lowest coefficient**

766 LEONARD : Look, do I think that you are talented and that you are beautiful? Of course I  
767 do. But isn't Los Angeles full of actresses who are just as talented, just as beautiful?  
768 All right, look, we'll come back to that.  
769 AMY : I do. Penny, Bernadette and I are sorry.  
770 RAJ : Oh, yes, we've got the moon and the trees and Elizabeth McNulty, who apparently  
771 died when she was the same age I am.  
772 SHELDON : And on a different, but not unrelated topic, based on your current efforts to  
773 buoy my spirits, do you truly believe that you were ever fit to be a cheer leader?  
774 SHELDON : Hello, female children. Allow me to inspire you with a story about a great  
775 female scientist. Polish-born, French-educated Madame Curie. Co-discoverer of  
776 radioactivity, she was a hero of science, until her hair fell out, her vomit and stool  
777 became filled with blood, and she was poisoned to death by her own discovery.  
778 With a little hard work, I see no reason why that can't happen to any of you. Are  
779 we done? Can we go?  
780 SHELDON : No, I don't think so. Those dolls represent three things I do not care for,  
781 clowns, children and raggedness. I think it's a lost cause.  
782 SHELDON : Yes. I think prolonged exposure to Penny has turned her into a bit of a  
783 Gabby Gertie.  
784 RAJ : Yes, isn't she an amazing actress.  
785 SHELDON : Actually, I thought the first two renditions were far more compelling. Previ-  
786 ously I felt sympathy for the Leonard character, now I just find him to be whiny  
787 and annoying.  
788 HOWARD : She was just so sad all the time. I was the only person who could cheer her  
789 up. Well, me and Ben and Jerry.

790 **6.10 PCA17**

791 **6.10.1 Highest coefficient**

792 SHELDON : Penny, a moment. We just had Thai food. In that culture, the last morsel  
793 is called the krengrjai piece, and it is reserved for the most important and valued  
794 member of the group.

795 LEONARD : Yeah, it's delicious, the sarcasm's a little stale, though. Hey, how about  
796 this? Until we figure out what to do with the ring, Penny holds on to it.

797 PENNY : Okay, sweetie, I don't know if we're gonna have cookies, or he's just gonna  
798 say hi, or really what's gonna happen, so just let me talk, and we'll. . .

799 PENNY : Fine. What do you want?

800 HOWARD : Okay, this one is for a Cadbury Creme Egg.

801 LEONARD : Ah, well, what's this? A pot of oatmeal? Or, thanks to you, what I will now  
802 call gloatmeal.

803 SHELDON : I'm sorry, but these are just ordinary foods with the names bent into tortured  
804 puns. The dishes themselves are in no way Halloweenie.

805 LEONARD : Ah, that's a good question. Apparently someone was being awfully flirty  
806 while not wearing their engagement ring, causing another someone to show up  
807 here thinking the first someone might be available.

808 PENNY : Okay, well, I'd offer you Halloween candy, but that's gone. So, what's up?

809 RAJ : Okay. Shall we? Oh, my God. It's light, it's flaky, it's buttery. You don't need to  
810 have sex with him, just eat one of these.

811 **6.10.2 Lowest coefficient**

812 RAJ : Then she's going to have to convince your mother to let you go into space.

813 HOWARD : Then get out of my house.

814 BERNADETTE : Yeah, if you want to go off the grid, you have to move out of your  
815 mother's house.

816 SHELDON : I can't believe my own mother is abandoning me.

817 HOWARD : I will. I'm obviously not going to live in my mother's house for the rest of  
818 my life. I'm not a child.

819 LEONARD : With your career?

820 BERNADETTE : You're a real hero, Howard.

821 BERNADETTE : I'm proud of her. This is a great opportunity. It's nice to see her take it  
822 seriously.

823 LEONARD : Also instead of just living in your mother's house, you could actually live  
824 inside her body.

825 LEONARD : And now you're also an astronaut.



## 826 **7 Annex 3: Dialogue example of Friends**

### 827 **7.1 PCA1**

#### 828 **7.1.1 Highest coefficient**

829 CHANDLER : Hey.

830 CHANDLER : Hey.

831 PHOEBE : Hey.

832 RACHEL : Hey.

833 ROSS : Hey.

834 MONICA : Hey.

835 RACHEL : Hey.

836 RACHEL : Hey.

837 CHANDLER : Hey.

838 ROSS : Hey.

#### 839 **7.1.2 Lowest coefficient**

840 RACHEL : Yeah. It's just gonna be too hard. Y'know? I mean, it's Ross. How can  
841 I watch him get married? Y'know it's just, it's for the best, y'know it is, it's...  
842 Y'know, plus, somebody's got to stay here with Phoebe! Y'know she's gonna be  
843 pretty big by then, and she needs someone to help her tie her shoes; drive her to the  
844 hospital in case she goes into labour.

845 RACHEL : Ross, you know what? She may need one..We're just going to have to make  
846 our peace with that! Monica and Chandler's apartment.

847 JOEY : Look we've got to find her. Phoebe just called!! Rachel's coming to tell Ross  
848 she loves him!!

849 CHANDLER : Well, she's just so much fun with Joey, I just assumed, she'd still be living  
850 with him.

851 JOEY : Well, remember when they got in that big fight and broke up and we were all  
852 stuck in her with no food or anything? Well, when Ross said Rachel at the wedding,  
853 I figured it was gonna happen again, so I hid this in here.

854 MONICA : I can't believe this. Rachel and Joey?

855 RACHEL : Look Monica, getting cold feet is very common. Y'know, it's-it's just because  
856 of all the anticipation and you just have to remember that you love Chandler. And  
857 also, I ran out on a wedding. You don't get to keep the gifts.

858 MONICA : No, look, she's obviously unstable, okay? I mean she's thinking about  
859 running out on her wedding day. Okay, fine! But I mean, look at the position she's  
860 putting him in! What's he gonna do? Ross is gonna run over there on the wedding  
861 day and break up the marriage?! I mean, who would do that?! Okay, fine, all right,  
862 but that's y'know, it's different! Although it did involve a lot of the same people.

863 PHOEBE : Why do you think, she's having so much fun living with Joey?

864 PHOEBE : It's so weird seeing Ross and Rachel with a baby. It's just so grown up.

### 865 **7.2 PCA2**

#### 866 **7.2.1 Highest coefficient**

867 RACHEL : Hey! Hi!

868 RACHEL : Hey! Hi!

869 ROSS : Hey! Hi!

870 PHOEBE : Hey! Hi!

871 RACHEL : Hey! We're here!

872 RACHEL : Hi!!

873 RACHEL : Hi!!

874 MONICA : Hi!

875 MONICA : Hi!

876 MONICA : Hi!

## 877 7.2.2 Lowest coefficient

878 RACHEL : Yeah, fair enough.

879 RACHEL : Really? You think so?

880 PHOEBE : Really? You think?

881 PHOEBE : Yeah, what's your point?

882 PHOEBE : Yeah, but not just that.

883 RACHEL : No, you're right, you are absolutely right. I mean that makes, that makes  
884 everything different.

885 JOEY : No. Really?

886 ROSS : Really? Its not just frowned upon?

887 JOEY : Yeah, I wouldn't know about that.

888 CHANDLER : Yeah, you're right about that.

## 889 7.3 PCA3

### 890 7.3.1 Highest coefficient

891 CHANDLER : Hi! I'm back. Yeah, that sounds great. Okay. Well, we'll do it then. Okay,  
892 bye-bye.

893 ROSS : I'll do it. Hey, whatever you need me to do, I'm your man. Whoa-oh-whoa! Are  
894 you, are you okay?

895 RACHEL : No, come on, I'm totally ok. I don't need you to come! I can totally handle  
896 this on my own.

897 ROSS : I'll help you. Yeah, I'll make up a schedule and make sure you stick to it. And  
898 plus, it'll give me something to do.

899 JOEY : Alright, alright. I'm around. Go ahead.

900 PHOEBE : Anyway, I should go. Okay, bye.

901 MONICA : Ok first of all...It would be great. But that's not what I'm here to talk to you  
902 about. I need to borrow some money.

903 MONICA : No, I'll do it. You just stick to your job.

904 ROSS : Oh, that'd be great! Okay, but if you do, make sure it seems like you're there to  
905 see him, okay, and you're not like doing it as a favour to me.

906 JOEY : Sure, yeah. I don't have time to say thank you because I really gotta go.

907 **7.3.2 Lowest coefficient**

908 RACHEL : Phoebe?! Wait a-but-but she just, she said that Joey was her backup.  
909 MONICA : They thought Joey was a child?  
910 CHANDLER : And then Joey remembered something.  
911 RACHEL : I thought it was Chandler!  
912 MONICA : Does it have to do with Joey?  
913 RACHEL : Joey! Why did you tell Chandler that Monica was getting a boob job?  
914 MONICA : And Rachel. And that's Chandler.  
915 RACHEL : And that's Phoebe , and that's Joey.  
916 RACHEL : And that's Phoebe , and that's Joey.  
917 ROSS : Phoebe that's not true.

918 **7.4 PCA4**

919 **7.4.1 Highest coefficient**

920 ROSS : Well it's okay. Chandler is talking to her.  
921 JOEY : I said a little bit Ross. Now, how about you Chandler?  
922 JOEY : Okay. I'm Chandler  
923 JOEY : Hey look Ross, you need to understand something okay? I uh...I am never gonna  
924 act on this Rachel thing, okay? I-I would never do anything to jeopardize my  
925 friendship with you.  
926 JOEY : It's okay, Ross, alright? I totally understand. Of course you're not fine. You're..  
927 You're Ross and Rachel.  
928 JOEY : I'm fine, I'm fine, it's just, it's just weird what's happening with her and Ross.  
929 You know, yesterday he asked me to fix him up with somebody.  
930 RACHEL : All right. So you're telling me that there is nothing going on between you  
931 and Chandler.  
932 ROSS : Fine, fine, Rachel your with Monica, Joey you're with me.  
933 PHOEBE : Okay. Oh umm, Chandler, Monica is looking for you.  
934 ROSS : Umm, okay, yeah, sure. But wh-what's wrong with Monica and Chandler?

935 **7.4.2 Lowest coefficient**

936 MONICA : What?! What is it?!  
937 MONICA : Oh my God! I love that!  
938 JOEY : What the hell is that?!  
939 JOEY : What the hell!  
940 ROSS : What?! It is?!  
941 RACHEL : Oh my God! That's the creepiest thing I've ever heard!  
942 RACHEL : Oh my God! Look at this!  
943 MONICA : What?! What is it?  
944 ROSS : I can't believe this!!  
945 JOEY : What?! What?! What is it?!

946 **7.5 PCA5**

947 **7.5.1 Highest coefficient**

948 RACHEL : Yeah! That would be great!  
949 MONICA : Yeah, that'd be great! Thank you!  
950 JOEY : Yeah! Yeah! That would be very helpful! Yeah.  
951 CHANDLER : All right, ready?  
952 ROSS : All right, ready?  
953 CHANDLER : All right, ready?  
954 PHOEBE : All right, ready?  
955 MONICA : All right, you ready?  
956 PHOEBE : Sure, yeah!  
957 JOEY : Sure. Yep.

958 **7.5.2 Lowest coefficient**

959 PHOEBE : But, also, what happened between you and your Mom?  
960 JOEY : She was nothing compared to you.  
961 JOEY : She was nothing compared to you.  
962 CHANDLER : Hey that's what I tell girls about me.  
963 JOEY : Me too. I mean I..haven't thought at all about how I put myself out there and  
964 said all that stuff and how you didn't feel the same way about me and-and how it  
965 was really awkward.  
966 ROSS : Well, well I am married. Even though I haven't spoken to my wife since the  
967 wedding.  
968 PHOEBE : Oh, because, you know... they don't like you.  
969 MONICA : Well, um, because mainly, um, they don't like you. I'm sorry.  
970 CHANDLER : Well it couldn't have been worse. A woman literally passed through me.  
971 OK, so what is it, am I hideously unattractive?  
972 ROSS : Hey, whatever it is, I am sure it has happened to me. Y'know, actually once-once  
973 I got dumped during sex.

974 **7.6 PCA6**

975 **7.6.1 Highest coefficient**

976 ROSS : Yes! We're getting married?!  
977 JOEY : No! No, and I did not ask her to marry me!  
978 ROSS : N-no! Okay? We've been through this! We're not gonna get married just because  
979 she's pregnant, okay?  
980 JOEY : Well all right then, I guess I shouldn't get to excited about the fact that I just  
981 kissed her!  
982 CHANDLER : OH...MY...GAWD! I am so sorry sweetie, are you okay? You didn't tell  
983 her we were getting married, did you?  
984 ROSS : Hey! I offered to marry her!  
985 CHANDLER : How can I not be upset? Okay? I finally fall in love with this fantastic  
986 woman and it turns out that she wanted you first!

987 PHOEBE : You're still gonna go out with her?!

988 ROSS : Yeah? Oh-oh, she'd be so excited!

989 ROSS : Okay. I did divert her and we ended up having a great time! Okay?

990 **7.6.2 Lowest coefficient**

991 PHOEBE : Wait a minute. What's his name?

992 MONICA : Hey. It's him. Who is it?

993 MONICA : Nothing, I don't know.

994 JOEY : Seriously, who is this guy?

995 JOEY : Who the hell is this guy?

996 RACHEL : Who are these men?

997 PHOEBE : Come on, give me something. What's his name?

998 CHANDLER : There's the man.

999 MONICA : Who, who are they?

1000 ROSS : C'mon, what's his name?

1001 **7.7 PCA9**

1002 **7.7.1 Highest coefficient**

1003 CHANDLER : What are you guys doing together?

1004 RACHEL : So what are you guys going to do?

1005 ROSS : What are you guys doing later?

1006 MONICA : So, what have you guys been doing?

1007 ROSS : Well, I'm gonna go see her. I want to bring her something, what do you think  
1008 she'll like?

1009 MONICA : What are you guys gonna do?

1010 ROSS : So uh, any ideas for the bachelor party yet?

1011 RACHEL : What're you guys doing out here?

1012 ROSS : Hey, what have you guys been up to?

1013 RACHEL : Hey, what have you guys been up to?

1014 **7.7.2 Lowest coefficient**

1015 PHOEBE : Oh, okay, oh.

1016 ROSS : Oh. Oh! Oh my God! Okay, I know this, give me-give me a second!

1017 PHOEBE : All right-Ooh! Oh dead God, save me!

1018 RACHEL : Oh-oh, sorry, it's this way, it's this way.

1019 RACHEL : Oh, okay!

1020 CHANDLER : Oh, okay!

1021 RACHEL : Oh, okay!

1022 MONICA : Oh, okay!

1023 ROSS : Oh, you're right, I'm sorry.

1024 JOEY : Oh, oh, oh, sorry.

1025 **7.8 PCA18**

1026 **7.8.1 Highest coefficient**

1027 JOEY : Yeah, he did, look... look, it's right there on the counter! Ha-ho-ho!  
1028 CHANDLER : Okay, did you see that?! With the inappropriate and the pinching!!  
1029 CHANDLER : Okay, did you see that?! With the inappropriate and the pinching!!  
1030 JOEY : Hey! Handcuffs! And fur line, nice! I didn't know you guys had it in ya!  
1031 JOEY : Look, it was a job all right?  
1032 CHANDLER : Look! Look! Look what the... Look what... Look what the floating heads  
1033 did!  
1034 ROSS : Okay, there was some staring and pointing.  
1035 MONICA : Yeah, yeah, it's interesting.. but y'know what? Just for fun, let's see what it  
1036 looked like in the old spot. Alright, just to compare. Let's see. Well, it looks good  
1037 there too. Let's just leave it there for a while.  
1038 JOEY : Uh, take a look at the guy's pants! I mean, I know you told us to show excitement,  
1039 but don't you think he went a little overboard?  
1040 RACHEL : Yeah, he did! Oh, see, this is what I'm talking about!

1041 **7.8.2 Lowest coefficient**

1042 RACHEL : Oh no.  
1043 PHOEBE : Oh no.  
1044 PHOEBE : Oh no.  
1045 RACHEL : Oh no.  
1046 CHANDLER : Oh no.  
1047 PHOEBE : Oh no.  
1048 ROSS : Oh no.  
1049 PHOEBE : Oh no.  
1050 PHOEBE : Oh no.  
1051 ROSS : Oh no.

1052 **7.9 PCA7**

1053 **7.9.1 Highest coefficient**

1054 CHANDLER : What? What?  
1055 CHANDLER : What? What?  
1056 ROSS : What? What?  
1057 ROSS : What? What?  
1058 PHOEBE : What? What?  
1059 ROSS : What? What?  
1060 JOEY : What? What?  
1061 ROSS : What? What?  
1062 ROSS : What? What?  
1063 MONICA : What?

1064 **7.9.2 Lowest coefficient**

1065 JOEY : Yeah, yeah, I met this woman.

1066 MONICA : Yes but my mom got me this job.

1067 PHOEBE : Yes, yes I do. God, oh it's just perfect! Wow! I bet it has a great story behind  
1068 it too. Did they tell you anything? Like y'know where it was from or...

1069 PHOEBE : No, not usually. But yeah, I could use one right now.

1070 PHOEBE : Yeah, kinda.

1071 MONICA : Yeah, just like the one in the poem.

1072 CHANDLER : Yes, money well spent!

1073 PHOEBE : No! But it's the nicest kitchen, the refrigerator told me to have a great day.

1074 CHANDLER : Yeah, I remember.

1075 MONICA : No. But I remember people telling me about it.

1076 **7.10 PCA17**

1077 **7.10.1 Highest coefficient**

1078 RACHEL : And um, what-what is that Ross?

1079 RACHEL : Ross's what?

1080 RACHEL : Ok, Ross, Ross, ok listen, what we have is amazing.

1081 CHANDLER : Oh, that's Ross's.

1082 CHANDLER : Oh, that's Ross's.

1083 RACHEL : Ross, I...

1084 RACHEL : For Ross, Ross, Ross.

1085 RACHEL : Well-well, I don't know Ross-really?

1086 RACHEL : Well-well, I don't know Ross-really?

1087 RACHEL : Um... Ross?

1088 **7.10.2 Lowest coefficient**

1089 MONICA : Hey, Joey, I don't think that you should leave Chandler alone. I mean it's  
1090 only been two days since he broke up with Kathy. Maybe you can go fishing next  
1091 week?

1092 JOEY : Chandler, you have to start getting over her. All right, if you play, you get some  
1093 fresh air, maybe it'll take your mind off Janice, and if you don't play, everyone will  
1094 be mad at you 'cause the teams won't be even. Come on.

1095 PHOEBE : Joey? How could you just let them leave?

1096 CHANDLER : Look, Joey, Kathy is clearly not fulfilling your emotional needs. But  
1097 Casey, I mean granted I only saw the back of her head, but I got this sense that  
1098 she's-she's smart, and funny, and gets you.

1099 MONICA : Wait a minute...Joey. Joey you can't ask her out, she's your roommate. It-it'll  
1100 be way too complicated.

1101 PHOEBE : Okay, but try and get Joey too.

1102 ROSS : No Joey! Look why don't, why don't we just let her decide? Okay? Hey-hey,  
1103 we'll each go out with her one more time. And-and we'll see who she likes best.

1104 RACHEL : Yeah, Joey kinda disabled it when I moved in.

1105 MONICA : Joey that is horrible.  
1106 CHANDLER : No, see the thing is I want to get out of here before Joey gets all worked  
1107 up and starts calling everybody bitch.

## 1108 **7.11 PCA16**

### 1109 **7.11.1 Highest coefficient**

1110 RACHEL : Oh, oh. . What is this?  
1111 PHOEBE : Oh, yeah. What's this?  
1112 JOEY : I don't know. It's-it's just...lately, I've been feeling... Okay, here's what it is...  
1113 You know what? I feel a lot better, thanks!  
1114 PHOEBE : Ohh. What is this?  
1115 CHANDLER : Oh-oh, what are you doing?  
1116 PHOEBE : Oh that's so great! Ohh, so what's going on now?  
1117 PHOEBE : Oh my God, what's it doing here?  
1118 JOEY : Yeah! Yeah, why? What's up?  
1119 PHOEBE : Oh, why? What's up?  
1120 PHOEBE : What-what's up?

### 1121 **7.11.2 Lowest coefficient**

1122 CHANDLER : And then he did.  
1123 PHOEBE : And we did.  
1124 ROSS : No you didn't. You said you would, but you never did!  
1125 CHANDLER : I sure did.  
1126 RACHEL : No, you could've lost your job.  
1127 ROSS : Sure, Monica would have to give her up.  
1128 CHANDLER : Yes he did.  
1129 RACHEL : That is not true. She did! She forced me!  
1130 RACHEL : That is not true. She did! She forced me!  
1131 ROSS : Monica! Would it?



1132 **NeurIPS Paper Checklist**

1133 **1. Claims**

1134 Question: Do the main claims made in the abstract and introduction accurately reflect the  
1135 paper's contributions and scope?

1136 Answer: [Yes] .

1137 Justification: The article follow indeed the abstract claims.

1138 Guidelines:

- 1139 • The answer NA means that the abstract and introduction do not include the claims  
1140 made in the paper.
- 1141 • The abstract and/or introduction should clearly state the claims made, including the  
1142 contributions made in the paper and important assumptions and limitations. A No or  
1143 NA answer to this question will not be perceived well by the reviewers.
- 1144 • The claims made should match theoretical and experimental results, and reflect how  
1145 much the results can be expected to generalize to other settings.
- 1146 • It is fine to include aspirational goals as motivation as long as it is clear that these goals  
1147 are not attained by the paper.

1148 **2. Limitations**

1149 Question: Does the paper discuss the limitations of the work performed by the authors?

1150 Answer: [Yes] .

1151 Justification: We outline the limitations clearly in the last paragraph of the conclusions.

1152 Guidelines:

- 1153 • The answer NA means that the paper has no limitation while the answer No means that  
1154 the paper has limitations, but those are not discussed in the paper.
- 1155 • The authors are encouraged to create a separate "Limitations" section in their paper.
- 1156 • The paper should point out any strong assumptions and how robust the results are to  
1157 violations of these assumptions (e.g., independence assumptions, noiseless settings,  
1158 model well-specification, asymptotic approximations only holding locally). The authors  
1159 should reflect on how these assumptions might be violated in practice and what the  
1160 implications would be.
- 1161 • The authors should reflect on the scope of the claims made, e.g., if the approach was  
1162 only tested on a few datasets or with a few runs. In general, empirical results often  
1163 depend on implicit assumptions, which should be articulated.
- 1164 • The authors should reflect on the factors that influence the performance of the approach.  
1165 For example, a facial recognition algorithm may perform poorly when image resolution  
1166 is low or images are taken in low lighting. Or a speech-to-text system might not be  
1167 used reliably to provide closed captions for online lectures because it fails to handle  
1168 technical jargon.
- 1169 • The authors should discuss the computational efficiency of the proposed algorithms  
1170 and how they scale with dataset size.
- 1171 • If applicable, the authors should discuss possible limitations of their approach to  
1172 address problems of privacy and fairness.
- 1173 • While the authors might fear that complete honesty about limitations might be used by  
1174 reviewers as grounds for rejection, a worse outcome might be that reviewers discover  
1175 limitations that aren't acknowledged in the paper. The authors should use their best  
1176 judgment and recognize that individual actions in favor of transparency play an impor-  
1177 tant role in developing norms that preserve the integrity of the community. Reviewers  
1178 will be specifically instructed to not penalize honesty concerning limitations.

1179 **3. Theory Assumptions and Proofs**

1180 Question: For each theoretical result, does the paper provide the full set of assumptions and  
1181 a complete (and correct) proof?

1182 Answer: [NA] .

1183 Justification: There are no theoretical results or proof in this paper.

1184 Guidelines:

- 1185 • The answer NA means that the paper does not include theoretical results.
- 1186 • All the theorems, formulas, and proofs in the paper should be numbered and cross-
- 1187 referenced.
- 1188 • All assumptions should be clearly stated or referenced in the statement of any theorems.
- 1189 • The proofs can either appear in the main paper or the supplemental material, but if
- 1190 they appear in the supplemental material, the authors are encouraged to provide a short
- 1191 proof sketch to provide intuition.
- 1192 • Inversely, any informal proof provided in the core of the paper should be complemented
- 1193 by formal proofs provided in appendix or supplemental material.
- 1194 • Theorems and Lemmas that the proof relies upon should be properly referenced.

#### 1195 4. Experimental Result Reproducibility

1196 Question: Does the paper fully disclose all the information needed to reproduce the main ex-

1197 perimental results of the paper to the extent that it affects the main claims and/or conclusions

1198 of the paper (regardless of whether the code and data are provided or not)?

1199 Answer: [Yes] .

1200 Justification: The code and data are provide. The datasets are public, and all the library used

1201 are also public.

1202 Guidelines:

- 1203 • The answer NA means that the paper does not include experiments.
- 1204 • If the paper includes experiments, a No answer to this question will not be perceived
- 1205 well by the reviewers: Making the paper reproducible is important, regardless of
- 1206 whether the code and data are provided or not.
- 1207 • If the contribution is a dataset and/or model, the authors should describe the steps taken
- 1208 to make their results reproducible or verifiable.
- 1209 • Depending on the contribution, reproducibility can be accomplished in various ways.
- 1210 For example, if the contribution is a novel architecture, describing the architecture fully
- 1211 might suffice, or if the contribution is a specific model and empirical evaluation, it may
- 1212 be necessary to either make it possible for others to replicate the model with the same
- 1213 dataset, or provide access to the model. In general, releasing code and data is often
- 1214 one good way to accomplish this, but reproducibility can also be provided via detailed
- 1215 instructions for how to replicate the results, access to a hosted model (e.g., in the case
- 1216 of a large language model), releasing of a model checkpoint, or other means that are
- 1217 appropriate to the research performed.
- 1218 • While NeurIPS does not require releasing code, the conference does require all submis-
- 1219 sions to provide some reasonable avenue for reproducibility, which may depend on the
- 1220 nature of the contribution. For example
- 1221 (a) If the contribution is primarily a new algorithm, the paper should make it clear how
- 1222 to reproduce that algorithm.
- 1223 (b) If the contribution is primarily a new model architecture, the paper should describe
- 1224 the architecture clearly and fully.
- 1225 (c) If the contribution is a new model (e.g., a large language model), then there should
- 1226 either be a way to access this model for reproducing the results or a way to reproduce
- 1227 the model (e.g., with an open-source dataset or instructions for how to construct
- 1228 the dataset).
- 1229 (d) We recognize that reproducibility may be tricky in some cases, in which case
- 1230 authors are welcome to describe the particular way they provide for reproducibility.
- 1231 In the case of closed-source models, it may be that access to the model is limited in
- 1232 some way (e.g., to registered users), but it should be possible for other researchers
- 1233 to have some path to reproducing or verifying the results.

#### 1234 5. Open access to data and code

1235 Question: Does the paper provide open access to the data and code, with sufficient instruc-

1236 tions to faithfully reproduce the main experimental results, as described in supplemental

1237 material?

1238  
1239  
1240  
1241  
1242  
1243  
1244  
1245  
1246  
1247  
1248  
1249  
1250  
1251  
1252  
1253  
1254  
1255  
1256  
1257  
1258  
1259  
1260  
1261  
1262  
1263  
1264  
1265  
1266  
1267  
1268  
1269  
1270  
1271  
1272  
1273  
1274  
1275  
1276  
1277  
1278  
1279  
1280  
1281  
1282  
1283  
1284  
1285  
1286  
1287  
1288  
1289

Answer: [Yes] .

Justification: Data and full code are on Github

Guidelines:

- The answer NA means that paper does not include experiments requiring code.
- Please see the NeurIPS code and data submission guidelines (<https://nips.cc/public/guides/CodeSubmissionPolicy>) for more details.
- While we encourage the release of code and data, we understand that this might not be possible, so “No” is an acceptable answer. Papers cannot be rejected simply for not including code, unless this is central to the contribution (e.g., for a new open-source benchmark).
- The instructions should contain the exact command and environment needed to run to reproduce the results. See the NeurIPS code and data submission guidelines (<https://nips.cc/public/guides/CodeSubmissionPolicy>) for more details.
- The authors should provide instructions on data access and preparation, including how to access the raw data, preprocessed data, intermediate data, and generated data, etc.
- The authors should provide scripts to reproduce all experimental results for the new proposed method and baselines. If only a subset of experiments are reproducible, they should state which ones are omitted from the script and why.
- At submission time, to preserve anonymity, the authors should release anonymized versions (if applicable).
- Providing as much information as possible in supplemental material (appended to the paper) is recommended, but including URLs to data and code is permitted.

## 6. Experimental Setting/Details

Question: Does the paper specify all the training and test details (e.g., data splits, hyper-parameters, how they were chosen, type of optimizer, etc.) necessary to understand the results?

Answer: [Yes]

Justification: The full code used are on gitub, that include all the information that we did (test split,...).

Guidelines:

- The answer NA means that the paper does not include experiments.
- The experimental setting should be presented in the core of the paper to a level of detail that is necessary to appreciate the results and make sense of them.
- The full details can be provided either with the code, in appendix, or as supplemental material.

## 7. Experiment Statistical Significance

Question: Does the paper report error bars suitably and correctly defined or other appropriate information about the statistical significance of the experiments?

Answer:[Yes] .

Justification: We report standard errors for our experimental results on GPT4 and human subjects.

Guidelines:

- The answer NA means that the paper does not include experiments.
- The authors should answer "Yes" if the results are accompanied by error bars, confidence intervals, or statistical significance tests, at least for the experiments that support the main claims of the paper.
- The factors of variability that the error bars are capturing should be clearly stated (for example, train/test split, initialization, random drawing of some parameter, or overall run with given experimental conditions).
- The method for calculating the error bars should be explained (closed form formula, call to a library function, bootstrap, etc.)
- The assumptions made should be given (e.g., Normally distributed errors).

- 1290
- It should be clear whether the error bar is the standard deviation or the standard error of the mean.
- 1291
- It is OK to report 1-sigma error bars, but one should state it. The authors should preferably report a 2-sigma error bar than state that they have a 96% CI, if the hypothesis of Normality of errors is not verified.
- 1292
- For asymmetric distributions, the authors should be careful not to show in tables or figures symmetric error bars that would yield results that are out of range (e.g. negative error rates).
- 1293
- If error bars are reported in tables or plots, The authors should explain in the text how they were calculated and reference the corresponding figures or tables in the text.
- 1294
- 1295
- 1296
- 1297
- 1298
- 1299

## 1300 8. Experiments Compute Resources

1301 Question: For each experiment, does the paper provide sufficient information on the com-  
1302 puter resources (type of compute workers, memory, time of execution) needed to reproduce  
1303 the experiments?

1304 Answer: [Yes] .

1305 Justification: There are no information about time or resources, the calculus used takes 4  
1306 seconds (to do the PCA) to a couple of minutes (to do the embeddings), and do not required  
1307 lots of memory

1308 Guidelines:

- The answer NA means that the paper does not include experiments.
- The paper should indicate the type of compute workers CPU or GPU, internal cluster, or cloud provider, including relevant memory and storage.
- The paper should provide the amount of compute required for each of the individual experimental runs as well as estimate the total compute.
- The paper should disclose whether the full research project required more compute than the experiments reported in the paper (e.g., preliminary or failed experiments that didn't make it into the paper).

## 1317 9. Code Of Ethics

1318 Question: Does the research conducted in the paper conform, in every respect, with the  
1319 NeurIPS Code of Ethics <https://neurips.cc/public/EthicsGuidelines?>

1320 Answer: [Yes]

1321 Justification: The paper conforms to the NeurIPS code of Ethics

1322 Guidelines:

- The answer NA means that the authors have not reviewed the NeurIPS Code of Ethics.
- If the authors answer No, they should explain the special circumstances that require a deviation from the Code of Ethics.
- The authors should make sure to preserve anonymity (e.g., if there is a special consideration due to laws or regulations in their jurisdiction).

## 1328 10. Broader Impacts

1329 Question: Does the paper discuss both potential positive societal impacts and negative  
1330 societal impacts of the work performed?

1331 Answer: [Yes] .

1332 Justification: The qualitative analysis shows how gender stereotyping is a large part of how  
1333 machine learning models make predictions. The article also critiques ideas around artificial  
1334 general intelligence (AGI) in a way we think illuminates debate on these issues.

1335 Guidelines:

- The answer NA means that there is no societal impact of the work performed.
- If the authors answer NA or No, they should explain why their work has no societal impact or why the paper does not address societal impact.

1336

1337

1338

- 1339
- 1340
- 1341
- 1342
- 1343
- 1344
- 1345
- 1346
- 1347
- 1348
- 1349
- 1350
- 1351
- 1352
- 1353
- 1354
- 1355
- 1356
- 1357
- Examples of negative societal impacts include potential malicious or unintended uses (e.g., disinformation, generating fake profiles, surveillance), fairness considerations (e.g., deployment of technologies that could make decisions that unfairly impact specific groups), privacy considerations, and security considerations.
  - The conference expects that many papers will be foundational research and not tied to particular applications, let alone deployments. However, if there is a direct path to any negative applications, the authors should point it out. For example, it is legitimate to point out that an improvement in the quality of generative models could be used to generate deepfakes for disinformation. On the other hand, it is not needed to point out that a generic algorithm for optimizing neural networks could enable people to train models that generate Deepfakes faster.
  - The authors should consider possible harms that could arise when the technology is being used as intended and functioning correctly, harms that could arise when the technology is being used as intended but gives incorrect results, and harms following from (intentional or unintentional) misuse of the technology.
  - If there are negative societal impacts, the authors could also discuss possible mitigation strategies (e.g., gated release of models, providing defenses in addition to attacks, mechanisms for monitoring misuse, mechanisms to monitor how a system learns from feedback over time, improving the efficiency and accessibility of ML).

## 11. Safeguards

1358

1359

1360

1361

Question: Does the paper describe safeguards that have been put in place for responsible release of data or models that have a high risk for misuse (e.g., pretrained language models, image generators, or scraped datasets)?

1362

Answer: [NA]

1363

Justification: No such risks

1364

Guidelines:

- 1365
- 1366
- 1367
- 1368
- 1369
- 1370
- 1371
- 1372
- 1373
- 1374
- The answer NA means that the paper poses no such risks.
  - Released models that have a high risk for misuse or dual-use should be released with necessary safeguards to allow for controlled use of the model, for example by requiring that users adhere to usage guidelines or restrictions to access the model or implementing safety filters.
  - Datasets that have been scraped from the Internet could pose safety risks. The authors should describe how they avoided releasing unsafe images.
  - We recognize that providing effective safeguards is challenging, and many papers do not require this, but we encourage authors to take this into account and make a best faith effort.

## 12. Licenses for existing assets

1375

1376

1377

1378

Question: Are the creators or original owners of assets (e.g., code, data, models), used in the paper, properly credited and are the license and terms of use explicitly mentioned and properly respected?

1379

Answer:[Yes]

1380

Justification: We credits the owners of the dataset and python libraries that we used

1381

Guidelines:

- 1382
- 1383
- 1384
- 1385
- 1386
- 1387
- 1388
- 1389
- 1390
- 1391
- 1392
- The answer NA means that the paper does not use existing assets.
  - The authors should cite the original paper that produced the code package or dataset.
  - The authors should state which version of the asset is used and, if possible, include a URL.
  - The name of the license (e.g., CC-BY 4.0) should be included for each asset.
  - For scraped data from a particular source (e.g., website), the copyright and terms of service of that source should be provided.
  - If assets are released, the license, copyright information, and terms of use in the package should be provided. For popular datasets, [paperswithcode.com/datasets](https://paperswithcode.com/datasets) has curated licenses for some datasets. Their licensing guide can help determine the license of a dataset.

- 1393
- For existing datasets that are re-packaged, both the original license and the license of the derived asset (if it has changed) should be provided.
- 1394
- If this information is not available online, the authors are encouraged to reach out to the asset’s creators.
- 1395
- 1396

### 1397 13. New Assets

1398 Question: Are new assets introduced in the paper well documented and is the documentation  
1399 provided alongside the assets?

1400 Answer: [Yes] .

1401 Justification: The details about training, limitations are in the article, and the code is on  
1402 Github.

1403 Guidelines:

- The answer NA means that the paper does not release new assets.
- Researchers should communicate the details of the dataset/code/model as part of their submissions via structured templates. This includes details about training, license, limitations, etc.
- The paper should discuss whether and how consent was obtained from people whose asset is used.
- At submission time, remember to anonymize your assets (if applicable). You can either create an anonymized URL or include an anonymized zip file.

### 1412 14. Crowdsourcing and Research with Human Subjects

1413 Question: For crowdsourcing experiments and research with human subjects, does the paper  
1414 include the full text of instructions given to participants and screenshots, if applicable, as  
1415 well as details about compensation (if any)?

1416 Answer: [Yes] .

1417 Justification: We recruit two relatives to do the test. We give them instructions and spread-  
1418 sheets with dialogue where they have to complete with the name of the characters

1419 Guidelines:

- The answer NA means that the paper does not involve crowdsourcing nor research with human subjects.
- Including this information in the supplemental material is fine, but if the main contribution of the paper involves human subjects, then as much detail as possible should be included in the main paper.
- According to the NeurIPS Code of Ethics, workers involved in data collection, curation, or other labor should be paid at least the minimum wage in the country of the data collector.

### 1428 15. Institutional Review Board (IRB) Approvals or Equivalent for Research with Human 1429 Subjects

1430 Question: Does the paper describe potential risks incurred by study participants, whether  
1431 such risks were disclosed to the subjects, and whether Institutional Review Board (IRB)  
1432 approvals (or an equivalent approval/review based on the requirements of your country or  
1433 institution) were obtained?

1434 Answer: [No] .

1435 Justification: The two subjects that we asked questions were relatives that like those TV  
1436 series immensely. There were no risks for them in answering the questions, therefore we do  
1437 not proceed for an Ethical approval for such a small study.

1438 Guidelines:

- The answer NA means that the paper does not involve crowdsourcing nor research with human subjects.
  - Depending on the country in which research is conducted, IRB approval (or equivalent) may be required for any human subjects research. If you obtained IRB approval, you should clearly state this in the paper.
- 1439
- 1440
- 1441
- 1442
- 1443

1444  
1445  
1446  
1447  
1448

- We recognize that the procedures for this may vary significantly between institutions and locations, and we expect authors to adhere to the NeurIPS Code of Ethics and the guidelines for their institution.
- For initial submissions, do not include any information that would break anonymity (if applicable), such as the institution conducting the review.
